# Supplementary material for: Urine proteomic analysis of the rat e-cigarette model
Source: PeerJ. 2023 Sep 22;11:e16041. doi: 10.7717/peerj.16041 (PMC10519197; doi:10.7717/peerj.16041)
Supplement: Supplemental Information 6 [file peerj-11-16041-s006.xlsx]

## Sheet: 0-3
Names	total	elements	0-3
1 2 3 4 5 6	3	P08721	Osteopontin (Bone sialoprotein 1) (Secreted phosphoprotein 1) (SPP-1)
		A0A0G2JYF9	Matrilin 3 (Matrilin 3 (Predicted))
1 2 3 4 5		P07151	Beta-2-microglobulin
	1	Q6IRS6;Q9QX79	Fetub protein (Fetuin-B)
1 2 3 4 6	7	P10758	Lithostathine (Islet cells regeneration factor) (ICRF) (Islet of Langerhans regenerating protein) (REG) (Pancreatic stone protein) (PSP) (Pancreatic thread protein) (PTP)
		Q9QYU9	Odorant-binding protein (Odorant-binding protein 1F) (Odorant-binding protein-like) (RCG36470)
		Q64724	C-CAM4 (RCG53616, isoform CRA_b)
		B3EY84	Lipocalin 13 (Odorant-binding protein 2A) (RCG45628)
		P22006;Q6P6X2	Seminal vesicle secretory protein 2 (Seminal vesicle secretory protein II) (SVS II)；RCG32102, isoform CRA_b (Semenogelin 1) (Semenogelin I)
		B3EY86;D3ZEY7	Lipocalin 11 (Progestagen-associated endometrial protein)
		F1LP05;P15999	ATP synthase subunit alpha
1 2 3 5 6	1	Q07936	Annexin A2 (Annexin II) (Annexin-2) (Calpactin I heavy chain) (Calpactin-1 heavy chain) (Chromobindin-8) (Lipocortin II) (Placental anticoagulant protein IV) (PAP-IV) (Protein I) (p36)
1 2 4 5 6	2	P05545	Serine protease inhibitor A3K (Serpin A3K) (CPI-21) (Contrapsin-like protease inhibitor 1) (GHR-P63) (Growth hormone-regulated proteinase inhibitor) (Kallikrein-binding protein) (KBP) (SPI-2.3) (Serine protease inhibitor 2) (SPI-2) (Thyroid hormone-regulated protein)
		D4AE68;P82471	Guanine nucleotide-binding protein G(q) subunit alpha
2 3 4 5 6	5	A0A0G2JST3	Keratin, type II cytoskeletal 1 (Cytokeratin-1) (Keratin-1) (Type-II keratin Kb1)
		G3V803;Q9Z1Y3	Cadherin-2 (Neural cadherin)
		P46413	Glutathione synthetase (GSH synthetase) (GSH-S) (EC 6.3.2.3) (Glutathione synthase)
		Q5I0D7	Xaa-Pro dipeptidase (X-Pro dipeptidase) (EC 3.4.13.9) (Imidodipeptidase) (Peptidase D) (Proline dipeptidase) (Prolidase)
1 2 3 4	4	A0A0G2K2V6	Keratin, type I cytoskeletal 10
		P42854
		Q99041;Z4YP11
		P01836
1 2 3 5	3	P55159
		P07171
		F7FJQ3
1 2 3 6	2	Q9WUC4
		P19132;Q66HI5
1 2 4 5	1	M0RBF1;M0RBJ7
1 2 4 6	6	Q6MG90
		P08649
		A0A0G2K1L0
		O70513
		P06685
		A0A0G2JWX9
1 2 5 6	3	A0A0G2K405;P12368
		Q5FVR0
		B2GV72
1 3 4 5	1	A0A0G2K2P7;P80201
1 4 5 6	5	F1M861
		P0DMW0;P0DMW1
		D4AE27
		A0A0H2UHM3;P06866
		D3ZE05
2 3 4 5	3	Q30KJ2
		P97580
		M0RBX7;M0RDX2;P15943
2 3 4 6	3	P14668;Q66HH8
		P22734
		P50399
2 4 5 6	4	D3ZPI8
		P02625
		P27590
		D3ZUQ1
3 4 5 6	6	Q00238
		Q63357
		F1LQQ8;P06760
		F1LQM1
		Q3MIE4
		P07150
1 2 3	4	P47853
		A0A0G2K0T2;P28648
		A0A0G2K013;Q9QXQ0
		A0A0G2JSP1
1 2 4	5	F1LRJ7;Q6IE51
		Q8CJD3
		P12346
		A0A0G2K4K4;G3V6U1;P55016;Q5PQV1
		G3V6G1
1 2 5	3	P10111
		D3ZAN2
		A0A0G2JSK1
1 2 6	5	P05964
		A0A0G2JXI1
		A0A0G2K946
		Q6P9V1
		Q9QX71
1 3 4	2	A0A0G2JV24;M0R979
		P08932
1 3 6	6	O55158
		B4F7A5
		G3V963
		G3V7L4
		D3ZNY8
		F1MAH6
1 4 5	3	P16296
		D3ZHM9
		Q9JI92
1 4 6	16	G3V928
		G3V836;P05371
		A0A0G2K022;I6L9G5
		P06757
		A0A0G2JVW1;P24594
		P04639
		F1LQ83
		Q63083
		P51635
		A5I9F0
		Q68FY4
		D3ZET1
		P08934
		A0A0G2K6T9
		P11980
		M0RAV0
1 5 6	4	A0A0G2K9B1;A0A0G2KB85;A0A0H2UHI5;P09006
		Q63434
		D4ABY7
		Q80YV8
2 3 4	6	P15399
		D3ZIT9
		A0A0G2K230;D3ZZI6
		P34058
		P10824
		A0A0G2K4M6;P62738;P63269
2 3 5	1	A0A0G2K7W2;F1LT79;Q5XI42
2 3 6	5	D3ZJ08;D3ZK97;M0RBX6;P84245;Q6LED0
		G3V843;P18292
		A0A0G2K9X1;Q62740
		D3ZDK4
		G3V6E7;P50609
2 4 5	2	F1M6Q3
		P12020
2 4 6	10	E9PSQ1
		G3V8K8
		A0A0G2K7S9
		A0A0G2K896
		F7EZQ4
		A0A0G2K0Q8;D3ZEV8
		Q641Z6
		Q6VPP3
		D4A7L8
		Q64319
2 5 6	2	D3ZJF8
		Q66HG4
3 4 5	5	D4A5P8
		P04897
		Q99MF4
		Q8R3Z7
		Q9EPF2
3 4 6	14	A0A0G2JWD0;Q91XN5
		F7F5P4
		P18418
		E9PT83
		P22283
		P24368
		F1MA24;P38444
		A0A0G2JTU6;A0A0G2K176;P08723
		A0A0G2K6T1;G3V844
		Q9JJI3
		P02780
		A0A0G2K8K8
		P30120
		B2GUX7
3 5 6	4	M0RAM5;P04041
		F1MAE5
		P31211
		M0R7L1
4 5 6	9	B0BNA5
		Q5M819
		B1H219
		E9PTA4
		P48032;Q4V8L0
		A0A0G2K3C5;Q9EQS4
		Q75NI5
		Q9JJH9
		P14480
1 2	8	P07314
		D4A5U3
		P07943
		Q62635
		G3V7W1
		F1LRJ9;Q8VIF7
		A0A0G2JXE0;A0A0G2JXI9;D3ZLY9;D3ZNH4;D3ZNZ9;D3ZWM5;D4A817;G3V8B3;G3V9C7;M0R4L7;M0RBQ5;Q00715
		Q64057
1 3	8	P13265
		A0A0G2JV12;F1LPD0
		P70549
		Q6MG70;Q99PW3
		A9UMV8;D3ZVK7;D4ACV3;G3V9C0;M0RCL5;M0RDM4;P02262;P0C169;P0C170;P0CC09;Q00728;Q4FZT6;Q64598;Q6I8Q6
		Q6AYR8
		D3ZVQ0
		F1M091
1 4	13	G3V8G5
		F1LZ11
		D3ZFC6;Q5EBC0
		D3ZBB2
		F1M5L5
		A0A0G2K931;E9PSV5
		Q9R1T3
		G3V637;Q62753
		P06399;Q7TQ70
		G3V6P2;Q01205
		Q5EBA7
		Q01177
		F1MAN8
1 5	6	A0A0G2JWX4;Q6IG02
		Q9Z2L0
		Q5XFX0
		Q9JJ40
		A0A0G2K8R6;E9PTZ7;E9PTZ9
		G3V6W3;O54947
1 6	21	P62332
		A0A0G2JY31;A0A0G2JZ73;P17475
		P24268;Q6P6T6
		A0A0H2UHR7;D3ZHA0
		F1LR02
		D3ZSU7
		P34900;Q6IRK3
		D3ZJF9
		G3V6X0;Q99PP0
		B2RZ27
		A0A0G2K6Z6;P29288
		P20761
		Q6AYS7
		Q6IUU3
		P70712
		F1LMI3
		P10959
		A0A0G2JZZ0
		A0A0G2K9I6;G3V7K3
		P01015
		Q63279
2 3	9	P24090
		M0R9A3
		Q5M8C6
		B2GV31
		F1LP82;P05712
		P00731
		P40241
		F1M4Q3
		Q9EQV6
2 4	19	P80020
		A0A0G2K7X7
		A0A096MJ41
		B0BNL6
		P16573;Q9JHL6;Q9JHL7
		P52759
		A0A0G2K4B4;P20646
		P54311
		Q63467
		Q5U362
		O35760
		Q99376
		A0A0G2JVT5;A0A0G2K7S7;Q6MG19
		D4A133
		P97675
		D3ZQ32
		A0A0G2JX36
		Q6IN22
		P98089
2 5	5	Q6NYB7
		E9PTY1
		P09656
		D4A0W2
		Q63259
2 6	33	D4A281
		Q80WY6
		A0A0G2K588;D4A917
		O55004
		M0RBU0
		B5DFA0
		D3ZAE6
		P07335
		F1M978;P97697
		O35244
		P35053;Q6P7Q2
		D3ZZ89
		P60711
		Q3ZAU4
		A0A096MJ90;F1LNW6
		P30152
		P97574
		Q6MG57
		Q9JI04
		P00774
		P28494
		G3V7Q8;P08426
		E9PU07
		Q10758
		G3V9M6
		P08650
		P21704
		A0A0G2K7I1
		D4ACX8
		F7DLY1
		Q99068
		G3V7K2;O70535
		F1LQW5
3 4	14	A0A0G2K722
		D3ZTX0
		O54861
		P53369
		P38438
		A0A0G2KB26;Q5XI43
		P26772
		A0A0G2JVT6
		Q4KLZ6
		Q8K4J7
		A0A0G2JSV2;M0R3X6;P47727
		P46462
		A0A0H2UHA1;Q8CHN8
		P63095;Q63803
3 5	5	Q6P6S4
		G3V7Y3;P35434
		F1LLW8
		Q10743
		A0A0G2JVV1;Q0H8B9
3 6	23	Q5U367
		P47967
		P08010
		Q6PEC1
		D3Z9U8
		M0R8A3
		Q6ZYN8
		P17559
		P07340
		Q497B0
		A0A096MK30;A0A1W2Q6E9
		P07647
		A0A0G2K7Y9
		P80067
		P04073
		B5DFJ0
		G3V8D5;P85971
		A0A0G2JSR9;Q91ZS3
		D3ZTV3
		A0A096MKB1
		A0A0G2JUT1;A0A5H1ZRU4;Q6AYP5
		P36374
		P16391
4 5	7	Q8CIZ5
		A0A0G2JWE1;A0A0G2K6J5;B2GV99;Q64119
		Q9ESS6
		P08753
		G3V8T4;Q9ESW0
		Q6GMN2
		Q64602
4 6	85	P54313
		P20059
		Q6AXR4
		Q499Q4
		P41562
		Q4KLZ0
		Q6AXR3
		D3ZBQ5
		A0A0G2JTC1;D4A6Y0
		Q5M872
		P02782
		F1MAD3
		A0A0G2K1P2;Q5RJL6
		A0A0G2JYC4
		M0RBH9
		P48037;Q6IMZ3
		Q5PPH0
		P04218
		F1LPR6
		P08290
		Q5I0E1
		Q5M7T6
		P32038
		F1LZJ4
		A0A0G2JUB0;Q810F4
		B0BNH1
		P04636
		D3ZXY4
		B0BMY7
		A0A0G2K7C3;D3ZEN1
		D3ZN06
		A0A0G2K7Y0;Q63135
		G3V8V1
		F1MA37;Q9ES87
		A0A0G2K085;D3Z895
		P22282
		A0A0G2JVG3
		P15978
		Q08420
		P20762
		Q64573
		B2RZ77
		F1M8K0
		G3V903
		G3V7H2;O35217
		P61459
		O70534
		D4A9Z8
		F7FAY5
		F1LRT1;P19112
		P11030
		D3ZLA3
		Q02974
		O35142
		Q63475
		A0A0G2K664;B1WC57
		M0RDF2;P01805
		Q8CHN3
		A0A0G2K8G8
		P36972
		P02631
		M0RAZ1
		P08592;Q6P6Q5
		F1M9X2;P19218
		A0A0G2JZL9;Q6AYD4
		Q6AYE5
		O88989
		P13221
		Q9QZK9
		P04797
		Q641X3
		D3ZCH6
		D3ZP44
		Q6AXS4
		A0A0G2JST1
		Q64604
		M0R485
		Q09326
		Q03336
		D3ZGB8
		A0A0G2KA71;Q5FVC5
		Q8CG45
		P98158
		A0A0G2KA90
		D4A400
5 6	22	A0A0A0MXX5;D4A1J4
		P19468
		P29975
		Q811X6
		F1M7B3
		Q6DGG1
		P04904
		B0BNN4
		D4A183
		P55280
		D3ZUU6
		G3V7C6
		P46720
		Q5M890
		Q5GAM5
		Q9R0T4
		Q7TP52
		A0A0G2K2B6;Q9Z0T0
		D4A9Q5
		Q8JZQ0
		G3V989;P97605
		Q9WVJ6
1	40	Q6IE12
		B2RYM1
		P19939
		Q6P734
		A0A0G2K8K3;Q64268
		A0A0G2JXB1;A0A0G2JXN6;P08699
		B2RYM3
		Q03626
		B1H232
		F1LXY6
		Q8K4G9
		P14046
		P62804
		A0A0G2JVP4;F1LM30;F1LPW0
		F1M957
		D3ZF44
		A1A5P1
		G3V9L4
		M0R3V4
		Q6IN37
		F7FHF3
		A0A0G2K135;Q9WUW3
		Q5EGY4
		G3V7A5
		A0A0G2K0N6
		F1LLX7
		P05065
		Q6P503
		F1M983;G3V9R2
		Q5M891;Q63514
		Q9EQV9
		P01946
		P02770
		A0A0G2JSZ5;Q63081
		Q68FP3
		Q68FP1
		Q5M8C3
		P82995
		P25093
		P18427
2	40	A0A0G2JYB5
		Q9R1E9
		Q9ESG3
		Q05030
		Q920A6
		Q80WD1
		M0RBK4
		F1LM16;P20961
		Q5XI77
		P38918
		P02761
		D3ZNR4;Q5ZQU0
		P20760
		A0A0H2UHD5;B1H234
		Q812E4
		D4A3L8
		A0A0G2JZS9
		G3V9K3
		Q6P762
		P55281
		A0A0G2K872;Q1WIM3
		A0A0G2JUY4
		A0A0H2UHB3;P48284
		Q62662
		P0DP29;P0DP30;P0DP31
		D3Z841
		A0A096MJ68
		D3ZXT7
		O35370
		M0R7P3
		Q4QQW8
		Q63751
		D4A3W2
		P10960
		G3V6D3;P10719
		Q5FWU4;Q8N7M5
		Q6P7B6
		Q07014
		Q642B0
		A0A0H2UHM5;P11598
3	34	D3ZQ57
		A0A0G2K392;A2VCV7;Q9JJS8
		A0A0G2JSJ5;Q0PMD2
		Q9WUF4
		Q63691
		G3V837;Q63493
		A0A0G2JW41
		Q6P9U0
		P14630
		P27274
		O89117
		Q5I0M3
		P35859
		D3ZCG9;D3ZQM3
		G3V7I9;P23377
		D4A8C5
		P55063
		Q6AYC4
		P50115
		Q99M75
		M0R5R0;P53813
		D4A8Z3
		Q587K3
		A0A0H2UHJ1;P50116
		O08557
		P01681
		P48508
		Q9WUW9
		G3V8H1
		A0A0G2K210;F1LSN4
		F7EL93
		A0A0G2K9E0;E2RUH2;P29315
		A0A0G2K5X3
		G3V6S2
4	72	D3ZPV8
		D3ZQP6
		D3ZQR5
		Q68FS4
		Q6P6T3
		Q9EQX9
		A2IBE2
		F7FMS0
		Q78P75
		A0A096P6L8
		F1MAQ9
		G3V7N8;P97840;Q6P7Q6
		M0RB22
		D4A8X4
		A0A0G2K6S0
		Q5I0M1
		Q64605
		P11762
		D4A934
		P0DSP1
		P19804
		Q63530
		Q4KLL7
		A0A0G2K2R5
		A0A0G2K5P7;Q64611
		Q498R7
		G3V826;P50137
		D3ZC54
		O70244
		A0A0G2K1G5;A0A0G2KAU7;F1M7L7;O35806
		F1M3Y4
		P20611;Q642D2
		Q4FZV0
		D3ZDH4
		D4AC39
		D3ZM39
		Q9ES53
		A0A0H2UHJ0;P08689
		P29534
		G3V7L3
		F1LWD0
		P23606
		M0R9L2
		A0A096MJP5
		F1M963;Q76HN1
		A0A0G2K8H6;P00786
		P31044
		P14925
		D3ZHG3
		F1M698
		A0A0G2K3W2
		G3V6D9
		Q642G2
		A0A0G2JWD5;Q6AY40
		Q5M7T5
		P63322
		F1LY81
		D3ZQN7
		Q925Q4
		A0A0G2JZV7
		Q10473
		D3ZZK3
		P02651
		P29598;Q3KR76
		Q63772
		G3V8X9
		Q6P7A9
		M0R8G6
		D3ZEP5
		B0BNG3
		A0A0G2JZ40;D4ABJ4
		M0R9M6;P80204;Q5M9H3
5	29	D3ZQH3
		Q6RUV5
		A0A0G2K0Q7;D3ZFU9
		P32755
		A0A096MIX6
		A0A0G2JV42
		B1WBN7
		G3V8R1;Q9JI85
		F8WGA2;Q9JHB9
		G3V8Y1
		Q4QQV8
		D3ZAU0
		A0A0G2K930;P09527
		P85834
		D3ZWC1
		Q5XIV1
		Q63942
		P07861
		O35509
		B0K010
		Q8R2H2
		P09456
		Q63355
		P02696
		Q5Y4N8
		P61589
		Q32KJ5
		P15684
		E9PSP1
6	185	G3V8G9;Q9QW30
		P57097
		Q66HT1
		M0R5J4;P04764
		F1LTY5
		Q68FU6
		D3ZPY8
		Q6AYT8
		Q9R066
		Q5HZW5
		A0A1W2Q642;D3ZGM7
		A0A0H2UHF8;P02764
		D4A6I7
		A0A1B0GWN8;Q812E9
		P00714
		D3ZBS2;Q63416
		A0A0G2K595;Q9WTW7
		P10252
		F1LQC5
		D3ZJX0;D3ZPY4
		D3ZD19
		P30121
		D3ZTX4
		P25113
		A0A0G2JY76;F1LP92;Q65Z14
		A0A0G2JSJ8;P17164
		D3ZJA4
		Q3B8R6;Q63678
		P84076;Q5PQN0
		P13852
		A0A0G2K676;F1LPK5;Q6RY07
		D3ZH39
		B0BN46
		A0A0G2K531;P23764
		Q9ES58
		P01830
		A0A0G2JTX5;A0A0G2K238;F1M7X5
		A0A0G2KAJ7
		A0A0G2JSZ3;Q06880
		P07897
		G3V8S0
		A0A0H2UHH2;P23680
		P61972
		P07154
		Q4AEF8
		D3ZVK5
		D3ZAJ1
		A0A0G2JXZ9
		F1LUV9
		F1LSV0
		M0RDH1
		G3V8Z5
		F1M7V6;Q1WIM1
		D1M8S3;F1M9B9;Q63621
		G3V7P2
		Q5XI73
		A0A0G2K2W0;D3ZTG5
		P14841
		P62260
		D4A5C0
		A0A0G2JVN2;G3V8G7;Q9JLS4
		P97546
		P42123
		Q63257
		A0A0G2JY48;F1MAJ0
		A0A0G2K828
		A0A0G2K7L8;F1LMS5
		P04785
		M0R8B5
		Q00657
		D3ZFP5
		Q498S8
		F8WG88;Q62632
		G3V6H1
		F1M9B2
		A0A0G2K4M4;A0A0G2K7A3;A0A0G2KAF5
		O70377
		P63029
		D4A144;O88917
		D4ACR1
		Q6AYS0
		G3V647;O35331
		P45479
		A0A0G2K845;Q8K3R4
		A0A0G2K499;F1M792
		P80202
		O88204
		P30904
		G3V833
		Q91XT9
		A0A0G2K3I3;D3ZJR7
		Q8VHC1
		D3ZTM7
		Q6AYS3
		D4ACM8;G3V954;Q08464
		F1M7I8
		P51647
		Q9EPB1
		Q62867
		P02767
		Q8R5M3
		F1LM54
		B4F795
		F1LRH4
		D3ZRJ6
		D3ZQ25
		G3V8S9
		D3ZVB7
		A0A0H2UHD6;A0A0H2UI32;Q9ET32
		P30919
		G3V812
		A0A0G2JU25;D3ZFD2
		Q4V885
		P05544
		G3V6K6
		D3Z8I7
		P48500
		D4A6K7
		G3V7I0;Q9Z0V6
		G3V6A0
		G3V8M6
		F1LVR0
		D4A9V5
		D3ZSY7
		F1LNW0;F1LSG7
		B2B9A9
		D4A4S5
		P16617
		Q569D2
		G3V8J3
		F1M4J1
		A0A0G2K9D7
		A0A0G2JYA3;D3ZNG3
		M0R7I5
		D4A3L3
		D4A2F6
		P27867
		A0A0G2K398;F8WFK6;P36970
		Q3B7D6
		D3ZS19
		P97553
		G3V6R5
		B1PLB1;B1PLB2
		Q5FVH2
		D3ZCH9;M0R8W9
		P25236
		F1LTJ5
		Q68FQ2
		P50398
		Q9JHY1
		P14740
		A0A0G2JVE6
		O35112
		M0R936
		B5DEZ8
		P70490
		P04642
		P80254
		A0A0G2K6K8;A0A1W2Q6J3;A0A1W2Q6L2
		Q3T1K5
		O70417
		Q5I0D5
		P97710;Q499T3
		G3V6K1
		F1LUS1
		D3ZK14
		Q8R490
		P02781
		P47820
		D3ZD84;M0RB60
		A0A0G2JSV5;P46953
		Q64240
		Q3KRC4
		M0RDA4
		D3ZGF1;F1LSA1;P26051
		M0RA79
		P85973
		D3ZF96
		Q07523
		D3ZHA1
		P0C0K7
		F1LVL2
		A0A0G2K8F6
		P28826

## Sheet: 0-12
Names	total	elements	Protein names
1 2 3 4 5 6	10	D4AE68;P82471	Guanine nucleotide-binding protein G(q) subunit alpha
		Q6IRS6;Q9QX79	Fetub protein (Fetuin-B)
		M0RDH1	Odorant-binding protein 2B (RCG35608)
		P02625	Parvalbumin alpha
		F7EZQ4	Fc fragment of IgG-binding protein-like 1
		G3V803;Q9Z1Y3	Cadherin-2 (Neural cadherin)
		D4A9V5	Lysyl oxidase homolog (EC 1.4.3.13)
		F1LQQ8;P06760	Beta-glucuronidase (EC 3.2.1.31)
		P07151	Beta-2-microglobulin
		A0A0G2K230;D3ZZI6	Desmocollin 3 (Desmocollin 3 (Predicted))
1 2 3 4 5	1	P51635	Aldo-keto reductase family 1 member A1 (EC 1.1.1.2) (EC 1.1.1.33) (EC 1.1.1.372) (EC 1.1.1.54) (3-DG-reducing enzyme) (Alcohol dehydrogenase [NADP(+)]) (Aldehyde reductase) (Glucuronate reductase) (EC 1.1.1.19) (Glucuronolactone reductase) (EC 1.1.1.20)
1 2 3 4 6	2	P14668;Q66HH8	Annexin A5 (Anchorin CII) (Annexin V) (Annexin-5) (Calphobindin I) (CPB-I) (Endonexin II) (Lipocortin V) (Placental anticoagulant protein 4) (PP4) (Placental anticoagulant protein I) (PAP-I) (Thromboplastin inhibitor) (Vascular anticoagulant-alpha) (VAC-alpha)
		G3V8V1	Granulin, isoform CRA_c (Progranulin)
1 2 3 5 6	4	A0A0G2K6Z6;P29288	Tartrate-resistant acid phosphatase type 5 (EC 3.1.3.2)
		P20761	Ig gamma-2B chain C region (Immunoglobulin heavy chain 1a)
		Q68FP1	Gelsolin (Actin-depolymerizing factor) (ADF) (Brevin)
		F1LPR6	Immunoglobulin heavy constant epsilon
1 2 4 5 6	7	F1M5L5	Ig-like domain-containing protein
		P12020	Cysteine-rich secretory protein 1 (32 kDa epididymal protein) (Acidic epididymal glycoprotein) (Protein D) (Protein E) (Protein IV) (Sialoprotein) (Sperm-coating glycoprotein) (SCP)
		F1M8K0	Dystroglycan 1 (Dystroglycan) (Dystrophin-associated glycoprotein 1)
		Q6VPP3	Chloride channel accessory 4 (Parturition-related protein PRP3)
		P08721	Osteopontin (Bone sialoprotein 1) (Secreted phosphoprotein 1) (SPP-1)
		G3V8T4;Q9ESW0	DNA damage-binding protein 1 (Damage-specific DNA-binding protein 1)
		Q99041;Z4YP11	Protein-glutamine gamma-glutamyltransferase 4 (EC 2.3.2.13) (Dorsal prostate transglutaminase) (Dorsal protein 1) (DP1) (Transglutaminase-4) (TGase-4)
2 3 4 5 6	3	A0A0G2K9Y0;F1LPQ6	Protein-glutamine gamma-glutamyltransferase (EC 2.3.2.13)
		P0DMW0;P0DMW1	Heat shock 70 kDa protein 1A (Heat shock 70 kDa protein 2) (HSP70-2) (HSP70.2)
1 2 3 4	4	Q6AXN2	EGF-containing fibulin-like extracellular matrix protein 1
		Q6MG70;Q99PW3
		Q5EBA7
		F7FJQ3
1 2 3 5	2	P55159
		Q9JI92
1 2 3 6	3	D3ZUQ1
		G3V8J3
		P01836
1 2 4 5	2	P19132;Q66HI5
		D4A400
1 2 4 6	10	A0A0G2K022;I6L9G5
		Q05030
		D3ZFC6;Q5EBC0
		Q5M7T9
		P08290
		O70513
		Q641Z6
		D3Z8I7
		A0A0G2JSV2;M0R3X6;P47727
		Q64319
1 2 5 6	5	M0RBF1;M0RBJ7
		P19468
		A0A0G2JWX9
		A0A0H2UHM3;P06866
		A0A0G2K2V6
1 3 4 5	2	A0A0G2JUY4
		D3ZBB2
1 3 4 6	10	A0A0G2JYC4
		P07897
		D3ZIF6
		P05545
		D3ZN06
		A0A0G2JSR9;Q91ZS3
		F1MA24;P38444
		A0A0G2K6T9
		B3EY86;D3ZEY7
		D3ZAU0
1 3 5 6	2	B1PLB1;B1PLB2
		Q64602
1 4 5 6	7	Q30KJ2
		B1H219
		M0R3V4
		Q63083
		P97580
		Q75NI5
		Q642B4
2 3 4 5	3	D3ZE05
		P16573;Q9JHL6;Q9JHL7
		Q6AXR3
2 3 4 6	7	Q9QYU9
		D4A144;O88917
		A0A0G2JZL9;Q6AYD4
		P46413
		F7EL93
		D3ZDK4
		P47967
2 3 5 6	3	A0A0G2JV12;F1LPD0
		Q9EPF2
		Q00238
2 4 5 6	4	F1M3Y4
		Q9JJI3
		D4A0W2
		F1LZ11
3 4 5 6	5	A0A0G2JWD0;Q91XN5
		F1LQM1
		Q9JJH9
		A0A0G2K6T1;G3V844
		A0A0G2K722
1 2 3	5	M0R9A3
		Q4QQV8
		A0A0G2K013;Q9QXQ0
		G3V9K3
		O08628
1 2 4	5	G3V637;Q62753
		P22734
		D3ZQN7
		A0A0G2JZV7
		P08644
1 2 5	6	Q9JJ40
		B5DEI2
		A0A0G2K0N6
		Q8CJD3
		P00762
		G3V6W3;O54947
1 2 6	11	P14480
		A0A0G2JY31;A0A0G2JZ73;P17475
		A0A0G2JSK1
		O35244
		P97574
		A0A0U1RRP9;Q7TP05
		A5I9F0
		A0A0G2K9D7
		M0RAM5;P04041
		P85973
		G3V8G5
1 3 4	4	O55158
		Q5I0E1
		A0A0G2K931;E9PSV5
		Q99M75
1 3 5	3	M0R5R0;P53813
		A0A0G2JTU6;A0A0G2K176;P08723
		F7F5P4
1 3 6	8	G3V833
		P22283
		P04073
		P06911
		P02770
		D4ACX8
		P31211
		A0A0G2JST3
1 4 5	3	F1LP42
		P46720
		P54313
1 4 6	25	G3V928
		G3V836;P05371
		Q78P75
		P06757
		Q5M872
		P04639
		A0A0G2K405;P12368
		F1LZJ4
		P04636
		P15399
		D3ZXY4
		Q5M819
		A0A0G2K9B1;A0A0G2KB85;A0A0H2UHI5;P09006
		P80202
		G3V903
		P18418
		Q5U362
		Q68FY4
		P08934
		P12346
		P02651
		Q3T1K5
		Q8CG45
		A0A0G2K8F6
		D3ZPY8
1 5 6	4	B5DFA0
		P22282
		G3V7W1
		Q9WUF4
2 3 4	8	P24090
		Q63357
		A0A0G2K2R5
		Q9QX71
		E9PT83
		Q8K4J7
		Q32KJ6
		G3V7D0;O88766
2 3 5	2	D3ZAN2
		Q5U367
2 3 6	6	D3ZJX0;D3ZPY4
		Q675A5
		A0A0G2K7W2;F1LT79;Q5XI42
		A0A0G2K828
		Q9EPB1
		Q6RUV5
2 4 5	4	P22006;Q6P6X2
		P36374
		F1M6Q3
		F1LQW5
2 4 6	16	Q5HZW5
		Q80WY6
		D3Z9U8
		P84076;Q5PQN0
		P17559
		F1LQ83
		P10758
		O70377
		P07647
		P52759
		Q64724
		P08650
		Q6AYE5
		Q3MIE4
		Q6GMN2
		A0A0G2JYB5
2 5 6	6	Q07936
		P30152
		D3ZJF8
		F1M7I8
		P04797
		F1MAD3
3 4 6	10	Q497B0
		A0A0G2K896
		G3V843;P18292
		G3V8D5;P85971
		Q6P7S1
		B2RZB5
		F1LWD0
		P02631
		A0A0G2KA71;Q5FVC5
		Q63691
3 5 6	5	Q9WUC4
		D3ZSU7
		D3ZFP5
		D4A4S5
		G3V7N8;P97840;Q6P7Q6
4 5 6	7	P48032;Q4V8L0
		A0A0G2K3C5;Q9EQS4
		P06685
		M0RAZ1
		Q64604
		Q5Y4N8
		F1MAN8
1 2	12	A0A0G2K8K3;Q64268
		D4A5U3
		F1LMA7;Q4TU93
		A0A0G2K872;Q1WIM3
		F1MAH6
		B4F795
		A0A096MJ68
		D3ZXT7
		D4A3W2
		P01946
		F1LUS1
		F1M091
1 3	7	Q03626
		Q5M8C6
		Q9R1T3
		D3ZWC1
		A9UMV8;D3ZVK7;D4ACV3;G3V9C0;M0RCL5;M0RDM4;P02262;P0C169;P0C170;P0CC09;Q00728;Q4FZT6;Q64598;Q6I8Q6
		Q68FP3
		Q66HT1
1 4	16	A0A0G2JSP1
		D3ZZT9
		Q9EQX9
		A0A0G2K1P2;Q5RJL6
		Q4KLL7
		P07943
		F1M861
		B2RZ77
		Q4KLZ6
		F1M963;Q76HN1
		G3V7L4
		Q9WUW9
		A0A0G2JV24;M0R979
		Q63772
		Q5M8C3
		G3V6G1
1 5	8	P10111
		A0A0G2JV42
		P62804
		A1A5P1
		P09606
		P20767
		P82995
		A0A0G2K595;Q9WTW7
1 6	38	P08932
		O88767
		M0R7L1
		F1LR02
		A0A0G2JVW1;P24594
		P04218
		Q5I0M1
		P42854
		G3V8S0
		B4F7A5
		Q9Z2L0
		A0A0G2K2P7;P80201
		G3V8Y1
		D3ZJ08;D3ZK97;M0RBX6;P84245;Q6LED0
		Q5FVR0
		A0A0G2K1L0
		A0A0G2K845;Q8K3R4
		G3V7I9;P23377
		P30904
		A0A0G2K135;Q9WUW3
		F1LM54
		Q6IUU3
		D3ZLA3
		P06399;Q7TQ70
		A0A0G2JXI1
		M0RDF2;P01805
		P10959
		F1LVR0
		F1M983;G3V9R2
		G3V686
		A0A0G2K9I6;G3V7K3
		Q9QZK9
		D3ZK14
		Q64240
		D3ZGF1;F1LSA1;P26051
		P25093
		D3ZHA1
		Q8K4Y7
2 3	12	F1MA46
		B2GV31
		D4A8C5
		B5DFJ0
		A0A0G2K4K2
		M0R7P3
		A0A0G2K7J5;D3ZTD8
		O35760
		P07171
		F1MAE5
		A0A0G2JSZ5;Q63081
		G3V6Q6
2 4	22	Q66HG4
		P63095;Q63803
		Q80YV8
		P02782
		A0A0G2JSS8;Q9R063
		E9PSQ1
		G3V8K8
		Q5VLR5
		P55280
		Q5I0M3
		A0A0G2K4B4;P20646
		D4AC39
		P07861
		Q62662
		F1LMI3
		G3V6D9
		P09456
		P04897
		A0A0G2K4K4;G3V6U1;P55016;Q5PQV1
		P97675
		D3ZQ32
		Q6ZYN8
2 5	11	P98089
		D4A3L8
		P00774
		Q6IE55
		A0A0G2JXF0
		P21704
		D4AE27
		Q6P9V1
		Q62635
		M0R4Z4
		A0A0G2JVV1;Q0H8B9
2 6	31	P10252
		Q6AXM6
		P07150
		P07335
		A0A0G2KAJ7
		D3ZZ89
		P60711
		Q3ZAU4
		F1M7V6;Q1WIM1
		F8WG88;Q62632
		A0A096MK30;A0A1W2Q6E9
		D4ACR1
		Q6MG57
		P05964
		P28494
		E9PU07
		P48199
		Q6P762
		A0A0H2UHB3;P48284
		F1LRH4
		P0DP29;P0DP30;P0DP31
		D4A2F6
		P50398
		P01015
		Q5I0D7
		O70417
		Q499T5
		A0A0G2JTG4;A0A0G2JWF2;F1M195;F1M1Q7
		Q99068
		M0R8G6
		D3ZQR5
3 4	11	F1M663
		Q62946
		G3V826;P50137
		P20611;Q642D2
		P24368
		B2GV72
		P46462
		Q925Q4
		A0A0G2JX36
		A0A0G2KA90
		Q63279
3 5	4	A0A0G2JSJ5;Q0PMD2
		Q5M890
		P02780
		P13265
3 6	19	A0A0G2JSJ8;P17164
		P07340
		A0A096MJ90;F1LNW6
		A0A0G2JVT6
		Q6AYS7
		G3V7Y3;P35434
		Q6AYC4
		G3V963
		P40241
		F1M4Q3
		F1M9X2;P19218
		Q569D2
		P27867
		Q3B7D6
		A0A096MKB1
		A0A0G2JUT1;A0A5H1ZRU4;Q6AYP5
		D3ZNY8
		A0A0G2K9E0;E2RUH2;P29315
		P20059
4 5	7	D3ZQP6
		D4A183
		P10715
		P27590
		D4A133
		P61589
		Q6AXR4
4 6	67	D4A5L9;P62898
		Q9EQV6
		P08010
		P62332
		P80020
		A0A0G2K890;P31977
		M0RBX7;M0RDX2;P15943
		P41562
		Q68FS4
		P13852
		D3ZBQ5
		M0RBU0
		M0RB22
		M0RBH9
		P48037;Q6IMZ3
		Q5PPH0
		P16391
		A0A096MJ41
		D4A8X4
		P09034
		D3ZVK5
		A0A0G2JUB0;Q810F4
		B0BNH1
		P50399
		P08649
		G3V7P2
		A0A0G2K7C3;D3ZEN1
		D4A5C0
		A0A0G2JVN2;G3V8G7;Q9JLS4
		A0A0G2K7Y0;Q63135
		F1MA37;Q9ES87
		A0A0G2K085;D3Z895
		G3V6X0;Q99PP0
		A0A0G2JVG3
		Q08420
		A0A0G2K0Q8;D3ZEV8
		G3V7H2;O35217
		Q4FZV0
		D3ZTM7
		P51647
		G3V9M6
		O70534
		D4A9Z8
		Q6AYR8
		A0A0G2JV37
		F7FAY5
		F7F389;Q62930
		M0R9L2
		O35142
		Q8CHN3
		A0A0H2UHM7;Q6AYZ1
		A0A0G2K8G8
		G3V6E7;P50609
		M0R7I5
		O88989
		D3ZS19
		Q641X3
		P08753
		D3ZCH6
		P70490
		P11980
		G3V8X9
		M0RA79
		D3ZF96
		P98158
		F1LVL2
		M0RC23
5 6	16	M0R9M6;P80204;Q5M9H3
		A0A0A0MXX5;D4A1J4
		A0A0G2JY76;F1LP92;Q65Z14
		F1M7B3
		M0RAV0
		F1M7X4;Q62956
		G3V7C6
		B2RZ27
		Q5XIV1
		P61459
		Q63434
		Q8R5M3
		A0A0G2JTX6;D3ZPN6
		P05544
		A0A0G2JYF9
		Q6TXG7
1	36	A0A1B0GWN8;Q812E9
		D3ZBS2;Q63416
		Q9R1E9
		P24268;Q6P6T6
		P27605
		Q6P734
		A0A0H2UHR7;D3ZHA0
		P25113
		P07314
		B2RYM3
		Q9JJ19
		D4A263
		P38918
		P14046
		Q5U2Q3
		A0A0G2K5P7;Q64611
		G3V7Q8;P08426
		F7FHF3
		P30713
		F1M498
		Q5M876
		Q9ES53
		P50115
		F1LW26
		P97584
		F7EKI5
		F1LS79
		P16296
		A0A0G2K2B6;Q9Z0T0
		A0A0G2K8R6;E9PTZ7;E9PTZ9
		P80254
		A0A0G2JZN1
		Q01177
		A0A0G2JXE0;A0A0G2JXI9;D3ZLY9;D3ZNH4;D3ZNZ9;D3ZWM5;D4A817;G3V8B3;G3V9C7;M0R4L7;M0RBQ5;Q00715
		G3V989;P97605
		P18427
2	40	D3ZPV8
		M0R7T1
		Q9ESG3
		O55004
		P50123
		Q7M0E3
		F1LM16;P20961
		Q5XI77
		G3V7Q7
		P47853
		P04905
		A0A0G2K8I5;D3ZG18
		O89117
		F8WGA2;Q9JHB9
		P62260
		A0A0G2K0T2;P28648
		Q91XN4
		A0A0G2JY48;F1MAJ0
		A0A0G2K7S9
		A0A0G2K8S9;Q6AYJ9
		Q05511
		Q5XIA6
		M0R9U2
		Q6IN37
		Q10758
		P0C0A9
		P55281
		D3ZUM4
		F1LSX3;Q63072
		A0A0G2K946
		Q63751
		D4ABY7
		A0A0G2KBC4;D4ACA7
		P32736
		A0A0G2K7I1
		F1LRJ9;Q8VIF7
		G3V9M0
		A0A0G2K5X3
		Q6IRK9
		A0A0H2UHM5;P11598
3	25	D3ZTX0
		P01039
		P70549
		G3V837;Q63493
		A0A0G2K4M6;P62738;P63269
		M0R8A3
		Q6P9U0
		B2RZ72
		A0A0G2JZS9
		F1LP82;P05712
		A0A0G2K7Y9
		P34058
		A0A0G2JU25;D3ZFD2
		G3V7I0;Q9Z0V6
		O08557
		Q9EQV9
		F1LLW8
		D3ZVQ0
		Q5M7T5
		Q99N82
		D3ZHM9
		A0A0G2K210;F1LSN4
		Q6P7A9
		P30120
		G3V6S2
4	56	D4A5P8
		E9PT65
		Q6P6T3
		A2IBE2
		F1LVQ8
		P10760
		Q6MG90
		M0RBK4
		Q811X6
		A0A0G2K6S0
		O54861
		P02761
		P11762
		D4A934
		P0DSP1
		D3ZPI8
		B0BMY7
		Q63530
		A0A0G2JSK5
		D3ZIT9
		P63018
		P38438
		B0BNL6
		O70244
		A0A0G2KB26;Q5XI43
		P15978
		F1LYX9
		A0A0G2K1G5;A0A0G2KAU7;F1M7L7;O35806
		Q64573
		P54311
		Q5EGY4
		Q63942
		P29534
		F1LRJ7;Q6IE51
		P10824
		G3V6P2;Q01205
		A0A096MJP5
		D4A4L6;M0R692
		A0A0G2JU71;F1LRE1
		A0A0G2K8H6;P00786
		O35509
		P14925
		F1M698
		Q642G2
		A0A0G2JWD5;Q6AY40
		F1LTJ5
		Q9ESS6
		G3V6D3;P10719
		Q8R3Z7
		Q99376
		A0A0G2JVT5;A0A0G2K7S7;Q6MG19
		Q63355
		G3V827;Q08415
		P29598;Q3KR76
		D3ZGB8
		Q9WVJ6
5	28	P00714
		A0A0G2JWX4;Q6IG02
		A0A0G2JW41
		Q99MA2
		Q920P6
		A0A0G2JTH4;P97829
		B1WBN7
		D3ZUD8
		G3V8R1;Q9JI85
		Q8CIZ5
		D3ZF44
		D3ZZR3
		Q5XFX0
		Q6TA48
		E9PTY1
		G3V7L3
		P97532
		P00731
		Q4V885
		B0BNN3
		A0A0G2JWE1;A0A0G2K6J5;B2GV99;Q64119
		P10960
		Q66H71
		Q8R490
		G3V722
		D3ZD84;M0RB60
		Q07523
		E9PSP1
6	183	F1LP05;P15999
		G3V8G9;Q9QW30
		P57097
		M0R5J4;P04764
		Q68FU6
		Q6AYT8
		Q9R066
		A0A1W2Q642;D3ZGM7
		A0A0H2UHF8;P02764
		D4A6I7
		Q499Q4
		Q63259
		D4A281
		F1LQC5
		A0A0G2K588;D4A917
		D3ZD19
		Q4KLZ0
		P19939
		P30121
		D3ZTX4
		Q6PEC1
		D4A9T2
		Q3B8R6;Q63678
		A0A0G2K2H0;E9PSX9;E9PSY0
		P17046
		A0A0G2JTC1;D4A6Y0
		A0A096P6L8
		A0A0G2JSJ2;Q4KM73
		P29975
		A0A0G2K676;F1LPK5;Q6RY07
		A0A0G2K0Q7;D3ZFU9
		D3ZH39
		P32755
		A0A140TAF0
		A0A0G2K531;P23764
		Q9ES58
		Q6DGG1
		P35053;Q6P7Q2
		A0A0G2JTX5;A0A0G2K238;F1M7X5
		A0A0G2JSZ3;Q06880
		Q5M7T6
		P32038
		A0A0H2UHH2;P23680
		P61972
		P07154
		Q4AEF8
		Q63797;Q6P9V7
		A0A0G2K561;F1LP13
		Q8K4G9
		D3ZAJ1
		A0A0G2JXZ9
		F1LUV9
		F1LSV0
		D3ZPC4
		P19804
		D1M8S3;F1M9B9;Q63621
		J3QTE2;Q80YN4
		A0A0G2K2W0;D3ZTG5
		P04904
		P14841
		B0BNN4
		P97546
		Q63257
		Q6AYQ9
		Q9QZK8
		P20760
		P04785
		D3ZJF9
		M0R8B5
		D3ZC54
		Q498S8
		F1LNP8
		G3V6H1
		F1M9B2
		A0A0G2K4M4;A0A0G2K7A3;A0A0G2KAF5
		A0A0G2K930;P09527
		P63029
		Q6AYS0
		Q9JI04
		G3V647;O35331
		Q642A7
		P20762
		E9PTA4
		Q499T2
		P45479
		F1M786;Q5GRG2
		A0A0G2K499;F1M792
		O88204
		D3ZJV7
		A0A0G2K3I3;D3ZJR7
		P26772
		Q8VHC1
		Q6AYS3
		D3ZDH4
		D4ACM8;G3V954;Q08464
		P26342
		D3ZM39
		Q62867
		P02767
		Q8VD89
		D3ZMS7
		D3ZRJ6
		F1LRT1;P19112
		P11030
		D3ZQ25
		G3V8S9
		Q02974
		D3ZVB7
		A0A0H2UHD6;A0A0H2UI32;Q9ET32
		P30919
		G3V812
		P09656
		A0A0G2K664;B1WC57
		Q5GAM5
		Q66H12
		P31044
		D4A6K7
		G3V6A0
		P05065
		Q9WUK5
		Q587K3
		G3V8M6
		P01041
		P36972
		B3EY84
		A0A0G2JZZ0
		O35370
		B2B9A9
		D3ZTV3
		P08592;Q6P6Q5
		A0A0G2K3W2
		F1M4J1
		A0A0G2JYA3;D3ZNG3
		D4A3L3
		A0A0G2K980;M0RBD5
		Q5M891;Q63514
		Q9R0T4
		Q8R2H2
		P13221
		A0A0G2QC46;F1M7B9;Q80W87
		P97603
		P97553
		P19814
		B2RYC9
		Q5FVH2
		D3ZCH9;M0R8W9
		Q68FQ2
		O70352;Q6IN14
		Q4KMA8;Q9JJ22
		Q9JHY1
		Q7TP52
		P14740
		O35112
		B5DEZ8
		A0A0G2JST1
		M0R485
		D4A9Q5
		P04642
		D4A7L8
		Q03336
		G3V8K5;Q9Z0J6
		A0A0G2K9X1;Q62740
		Q5I0D5
		P97710;Q499T3
		Q8JZQ0
		G3V6K1
		Q5XI32
		P47820
		A0A0H2UHA1;Q8CHN8
		A0A0G2JSV5;P46953
		Q3KRC4
		M0RDA4
		G3V7K2;O70535
		Q63318
		A0A0G2JZ40;D4ABJ4
		P15684
		D3ZAN3
		Q10743
		P0C0K7
		Q6IN22
		Q642B0
		P28826

## Sheet: 0-15
Names	total	elements	Protein names
1 2 3 4 5 6	8	Q6IRS6;Q9QX79	Fetub protein (Fetuin-B)；Fetuin-B (Fetuin-like protein IRL685)
		A0A0G2K9Y0;F1LPQ6
		B3EY84	Lipocalin 13 (Odorant-binding protein 2A) (RCG45628)
		D3ZS19	Alpha-2-macroglobulin-like 1
		P10960	Prosaposin (Sulfated glycoprotein 1) (SGP-1) [Cleaved into: Saposin-A; Saposin-B-Val; Saposin-B; Saposin-C; Saposin-D]
		Q9JJI3	Alpha-2u globulin (Alpha-2u globulin PGCL3) (RCG31988)
		P07151	Beta-2-microglobulin
		D3ZE05	Cartilage intermediate layer protein 2 (Cartilage intermediate layer protein 2 (Predicted))
1 2 3 4 5	7	D4A183	Similar to Vanin-3 (Predicted) (Vanin 3)
		P27590	Uromodulin (Tamm-Horsfall urinary glycoprotein) (THP) [Cleaved into: Uromodulin, secreted form]
		D4AC39	Fibronectin leucine-rich transmembrane protein 1 (Similar to fibronectin leucine rich transmembrane protein 1 (Predicted))
		Q8K4J7	Resistin
		P22006;Q6P6X2	Seminal vesicle secretory protein 2 (Seminal vesicle secretory protein II) (SVS II)；RCG32102, isoform CRA_b (Semenogelin 1) (Semenogelin I)
		D4A133	H(+)-transporting two-sector ATPase (EC 7.1.2.2)
		P80020	Gastrotropin (GT) (14 kDa bile acid-binding protein) (Fatty acid-binding protein 6) (I-BABP) (Ileal lipid-binding protein) (ILBP) (Intestinal 15 kDa protein) (I-15P)
1 2 3 4 6	15	F1LZ11	Ig-like domain-containing protein
		A0A0G2JWD0;Q91XN5	Prominin 1
		A0A0G2K2V6	Keratin, type I cytoskeletal 10
		P10758	Lithostathine (Islet cells regeneration factor) (ICRF) (Islet of Langerhans regenerating protein) (REG) (Pancreatic stone protein) (PSP) (Pancreatic thread protein) (PTP)
		A0A0G2K2R5	EGF-containing fibulin extracellular matrix protein 2
		A0A0G2JST3	Keratin, type II cytoskeletal 1 (Cytokeratin-1) (Keratin-1) (Type-II keratin Kb1)
		F7F389;Q62930	Complement component C9
		A0A0G2JSR9;Q91ZS3	45 kDa calcium-binding protein (Stromal cell-derived factor 4)
		P08721	Osteopontin (Bone sialoprotein 1) (Secreted phosphoprotein 1) (SPP-1)
		P14668;Q66HH8	Annexin A5 (Anchorin CII) (Annexin V) (Annexin-5) (Calphobindin I) (CPB-I) (Endonexin II) (Lipocortin V) (Placental anticoagulant protein 4) (PP4) (Placental anticoagulant protein I) (PAP-I) (Thromboplastin inhibitor) (Vascular anticoagulant-alpha) (VAC-alpha)
		F1M9X2;P19218	Pancreatic secretory granule membrane major glycoprotein GP2 (RCG39392, isoform CRA_b)
		G3V8J3	Chymotrypsin-like, isoform CRA_a (Proteasome subunit beta type-10)
		P07171	Calbindin (Calbindin D28) (D-28K) (Spot 35 protein) (Vitamin D-dependent calcium-binding protein, avian-type)
		P46413	Glutathione synthetase (GSH synthetase) (GSH-S) (EC 6.3.2.3) (Glutathione synthase)
		P42854	Regenerating islet-derived protein 3-gamma (REG-3-gamma) (Pancreatitis-associated protein 3) (Regenerating islet-derived protein III-gamma) (Reg III-gamma) [Cleaved into: Regenerating islet-derived protein 3-gamma 16.5 kDa form; Regenerating islet-derived protein 3-gamma 15 kDa form]
1 2 3 5 6	5	Q99041;Z4YP11	Protein-glutamine gamma-glutamyltransferase 4 (EC 2.3.2.13) (Dorsal prostate transglutaminase) (Dorsal protein 1) (DP1) (Transglutaminase-4) (TGase-4)
		P55159	Serum paraoxonase/arylesterase 1 (PON 1) (EC 3.1.1.2) (EC 3.1.1.81) (EC 3.1.8.1) (Aromatic esterase 1) (A-esterase 1) (Serum aryldialkylphosphatase 1)
		Q8R5M3	Leucine-rich repeat-containing protein 15 (Leucine-rich repeat protein induced by amyloid-beta) (rLib)
		F1LQQ8;P06760	Beta-glucuronidase (EC 3.2.1.31)
		A0A0G2K896	Similar to RIKEN cDNA 1300017J02
1 2 4 5 6	7	Q30KJ2	Beta-defensin 50 (BD-50) (Defensin, beta 50)
		M0R3V4	Myeloid-derived growth factor
		B2RZ27	SH3 domain-binding glutamic acid-rich-like protein 3 (TNF inhibitory protein B1) (TIP-B1)
		A0A0G2JSV2;M0R3X6;P47727	Carbonyl reductase (NADPH) (EC 1.1.1.184)
		D4A9V5	Lysyl oxidase homolog (EC 1.4.3.13)
		F1M6Q3	Collagen type IV alpha 2 chain
		P15399	Probasin (PB) (M-40)
1 3 4 5 6	6	F7F5P4	Interleukin 18-binding protein
		P97580	Beta-microseminoprotein (Prostate secreted seminal plasma protein) (Prostate secretory protein of 94 amino acids) (PSP-94) (PSP94)
		G3V803;Q9Z1Y3	Cadherin-2 (Neural cadherin) (N-cadherin) (CD antigen CD325)
		Q75NI5	Cadherin 15 (M-cadherin)
		Q9JJH9	Alpha-2u globulin (Alpha-2u globulin PGCL3) (RCG31930)
		Q00238	Intercellular adhesion molecule 1 (ICAM-1) (CD antigen CD54)
2 3 4 5 6	6	D3Z9U8	S100 calcium-binding protein A7-like 2 (Similar to S100 calcium-binding protein, ventral prostate (Predicted))
		D4A144;O88917	Adhesion G protein-coupled receptor L1 (Calcium-independent alpha-latrotoxin receptor 1) (CIRL-1) (Latrophilin-1)
		Q63083	Nucleobindin-1 (Bone 63 kDa calcium-binding protein) (CALNUC)
		P20761	Ig gamma-2B chain C region (Immunoglobulin heavy chain 1a)
		P36374	Prostatic glandular kallikrein-6 (EC 3.4.21.35) (Glandular kallikrein-8) (rGK-8) (P1 kallikrein) (Tissue kallikrein)
1 2 3 4	5	Q6AXN2
		Q6MG70;Q99PW3
		Q4KLZ6
		Q63467
		P00714
1 2 3 5	5	A0A0G2JV12;F1LPD0
		A0A0G2K230;D3ZZI6
		P21704
		F1LM84
		F1LP05;P15999
1 2 3 6	11	Q5U367
		A0A0G2JSP1
		P19468
		E9PSQ1
		A0A0G2K828
		A0A0G2K013;Q9QXQ0
		Q9QX71
		A0A0G2JUY4
		P13221
		Q5I0D7
		D3ZFC6;Q5EBC0
1 2 4 5	3	B0BNL6
		D4A0W2
		Q6AXR4
1 2 4 6	13	Q80WY6
		D3ZXY4
		A0A0G2JV37
		F1LRT1;P19112
		A0A0G2K3C5;Q9EQS4
		P08650
		A0A0H2UHM7;Q6AYZ1
		A0A0G2K3W2
		D3ZCH6
		Q5I0D5
		P85973
		D3ZAN3
		P14480
1 2 5 6	4	D4A400
		A0A0G2JWX9
		P80202
		D3ZZT9
1 3 4 5	2	G3V9K3
		P08290
1 3 4 6	7	P60711
		Q9WUC4
		G3V963
		A0A0G2K9I6;G3V7K3
		Q5EBA7
		A0A0G2K9E0;E2RUH2;P29315
		D3ZAN2
1 3 5 6	3	F1LQM1
		P31211
		G3V836;P05371
1 4 5 6	9	A0A0G2K2P7;P80201
		P22282
		A0A0G2JVT6
		P0DMW0;P0DMW1
		D3Z8I7
		P08934
		P50398
		Q3MIE4
		Q4QQV8
2 3 4 5	4	F7EZQ4
		B2GUX7
		Q6VPP3
		Q9JI92
2 3 4 6	10	P09034
		P07897
		D3ZSU7
		G3V7D0;O88766
		G3V843;P18292
		Q5M819
		O88989
		F7EL93
		D3ZDK4
		F1LPR6
2 3 5 6	3	P30152
		P05964
		P02782
2 4 5 6	5	P12020
		B0BNN4
		B1H219
		P01015
		Q5HZW5
3 4 5 6	8	P10252
		Q9EPF2
		F1LZJ4
		F1M7V6;Q1WIM1
		D3ZN06
		G3V6X0;Q99PP0
		Q5Y4N8
		F7FJQ3
1 2 3	9	O55004
		Q5XI77
		P14630
		P38918
		P47853
		Q5U362
		D3ZVQ0
		Q32KJ6
		Q64602
1 2 4	11	A0A0G2K022;I6L9G5
		P10760
		M0R9A3
		F1M5L5
		A0A0G2K7W2;F1LT79;Q5XI42
		P07943
		O08628
		F1LRJ7;Q6IE51
		Q62635
		P20767
		P02625
1 2 5	5	D4A5U3
		A1A5P1
		P07861
		Q6P9V1
		A0A0G2K588;D4A917
1 2 6	22	D3ZUQ1
		M0RBF1;M0RBJ7
		D3ZBB2
		Q811X6
		P04218
		D3ZIF6
		P42123
		P97574
		D3ZJF9
		A0A0G2K4M4;A0A0G2K7A3;A0A0G2KAF5
		D4ACR1
		Q6MG57
		P00774
		P28494
		A0A0H2UHB3;P48284
		G3V8D5;P85971
		F1LRH4
		A0A0G2JXI1
		D4A4S5
		F1LUS1
		Q07523
		Q9WVJ6
1 3 4	8	G3V6S2
		P06757
		F1MA46
		G3V826;P50137
		E9PT83
		Q6AYR8
		A0A0G2JX36
		D3ZH39
1 3 6	5	B0BN46
		P04073
		Q02974
		P01946
		D4A5L9;P62898
1 4 5	9	A0A0G2K8K3;Q64268
		Q9EQX9
		M0RDH1
		P63018
		P05065
		Q4KMA8;Q9JJ22
		P46462
		Q6GMN2
		G3V6W3;O54947
1 4 6	17	D4A6I7
		G3V8G5
		Q63357
		P50399
		P05545
		Q9QYU9
		F1M7I8
		P48032;Q4V8L0
		B2RZB5
		A5I9F0
		F1LLX7
		G3V7L4
		P63322
		F1MAE5
		P11980
		Q6IN22
		P31044
1 5 6	2	Q68FP1
		M0RBX7;M0RDX2;P15943
2 3 4	5	Q6IN37
		Q5M7T5
		A0A0H2UHA1;Q8CHN8
		A0A0G2K8K8
		O89117
2 3 5	3	A0A0U1RRP9;Q7TP05
		P0C0A9
		P47967
2 3 6	11	D3ZJX0;D3ZPY4
		P07150
		Q7M0E3
		F8WG88;Q62632
		A0A0G2K2L1;Q9WTQ2
		G3V647;O35331
		P20762
		Q9EPB1
		P19814
		Q99068
		A0A0G2JSJ5;Q0PMD2
2 4 5	7	P98089
		P19132;Q66HI5
		P09456
		A0A0G2JSZ5;Q63081
		F1LRJ9;Q8VIF7
		Q07014
		P41562
2 4 6	22	Q05030
		P84076;Q5PQN0
		B5DFA0
		P08649
		A0A0G2K7C3;D3ZEN1
		A0A0G2K085;D3Z895
		O70513
		Q08420
		P51635
		Q6AYS7
		O70534
		D3ZLA3
		A0A0G2K664;B1WC57
		Q8CHN3
		G3V8M6
		P02631
		A0A0G2JZL9;Q6AYD4
		D4A2F6
		D3ZHM9
		A0A0G2JZV7
		A0A0G2K9X1;Q62740
		D4A8C5
2 5 6	5	B5DFJ0
		Q6IE55
		M0RAZ1
		P25093
		G3V6Q6
3 4 5	5	D4A5P8
		A0A0G2K890;P31977
		Q07936
		Q9ESS6
		Q66HT1
3 4 6	11	Q80YV8
		A0A0G2JYC4
		P32755
		B4F7A5
		P04904
		B2RZ77
		Q64724
		D3ZGB8
		A0A0G2KA71;Q5FVC5
		A0A0G2KA90
		G3V6G1
3 5 6	6	P17559
		D3ZAU0
		P26772
		A0A096MKB1
		B1PLB1;B1PLB2
		F1LQW5
4 5 6	28	F1LQC5
		M0R9M6;P80204;Q5M9H3
		P30121
		D4AE68;P82471
		Q78P75
		A0A0G2K405;P12368
		G3V7P2
		A0A0G2JVN2;G3V8G7;Q9JLS4
		P52759
		F1M8K0
		G3V903
		Q5XIV1
		F1MAH6
		P06911
		Q68FY4
		Q6AYE5
		Q9R0T4
		P27867
		Q9QZK9
		A0A0G2KBC4;D4ACA7
		F1LTJ5
		O35112
		B5DEZ8
		G3V8T4;Q9ESW0
		Q3T1K5
		Q8JZQ0
		D3ZK14
		P18427
1 2	21	Q9R1E9
		Q6RUV5
		Q03626
		A0A0G2JV42
		P27274
		Q8K4G9
		G3V8Y1
		G3V6T7;P38659
		D3ZUU6
		Q5XIA6
		B5DEI2
		P51647
		F1M498
		D3ZUM4
		Q4V885
		P06685
		A0A0G2K946
		F1LY81
		A0A0G2K4K4;G3V6U1;P55016;Q5PQV1
		Q8K1G0
		Q6IE12
1 3	12	A0A0G2K722
		P04639
		M0RAV0
		Q9R1T3
		D3ZCG9;D3ZQM3
		D3ZWC1
		A9UMV8;D3ZVK7;D4ACV3;G3V9C0;M0RCL5;M0RDM4;P02262;P0C169;P0C170;P0CC09;Q00728;Q4FZT6;Q64598;Q6I8Q6
		A0A0G2K2W1
		B3EY86;D3ZEY7
		Q68FP3
		A0A0G2JXE0;A0A0G2JXI9;D3ZLY9;D3ZNH4;D3ZNZ9;D3ZWM5;D4A817;G3V8B3;G3V9C7;M0R4L7;M0RBQ5;Q00715
		P63095;Q63803
1 4	14	P62963
		Q5M7T9
		P07483
		Q7TQ94
		P54311
		Q641Z6
		A0A0G2K0N6
		A0A096MJP5
		G3V6E7;P50609
		P04897
		G3V827;Q08415
		A0A0G2JV24;M0R979
		Q5M8C3
		Q64319
1 5	11	P29975
		Q6P9U0
		D4A263
		P34900;Q6IRK3
		Q4FZV0
		B0K010
		O70352;Q6IN14
		A0A0G2K8R6;E9PTZ7;E9PTZ9
		P02780
		P80254
		A0A0G2JSK1
1 6	36	Q9ESG3
		M0R7L1
		A0A0G2JVW1;P24594
		P10111
		Q6DGG1
		Q6P6S4
		P32038
		P04636
		D3ZAJ1
		P14841
		Q6AYQ9
		D3ZJ08;D3ZK97;M0RBX6;P84245;Q6LED0
		M0R8B5
		A0A0G2K1L0
		G3V6H1
		Q6AYS0
		P22283
		Q8VHC1
		Q6IUU3
		P46720
		G3V8S9
		Q63475
		Q66H12
		D4A6K7
		F1LVR0
		A0A0G2JYF9
		Q3B7D6
		P97553
		P14740
		B3DM90;Q8CGU6
		P04642
		Q03336
		P97710;Q499T3
		Q64240
		P98158
		Q8K4Y7
2 3	15	F1M663
		F1LVQ8
		P16391
		P19804
		A0A096MJ90;F1LNW6
		B2GV31
		P07647
		P24368
		G3V7Y3;P35434
		Q9EQV9
		F1LLW8
		F1LS79
		Q6P7A9
		Q6IRK9
		D3ZQH3
2 4	16	A0A096MJ41
		P04916
		P24090
		F1LMW3
		Q5VLR5
		F1M3Y4
		F1M861
		M0R9U2
		F7FHF3
		P55281
		D4A4L6;M0R692
		P36972
		Q63751
		Q6AXS4
		A0A0G2JVT5;A0A0G2K7S7;Q6MG19
		A0A0G2JYB5
2 5	13	P50123
		O35244
		F8WGA2;Q9JHB9
		D4A3L8
		Q642A7
		Q8CJD3
		P09656
		A0A096MJ68
		A0A0G2K7J5;D3ZTD8
		A0A0G2K7I1
		D3ZEP5
		A0A0H2UHM3;P06866
		Q63279
2 6	28	Q6MG73
		M0RC23
		A0A0H2UHF8;P02764
		P08932
		P24268;Q6P6T6
		A0A0G2JSJ8;P17164
		A0A0G2K531;P23764
		F1LXY6
		D3ZZ89
		B0BNA5
		G3V8K8
		F1LSV0
		Q3ZAU4
		D4A5C0
		D3ZC54
		A0A0G2K6Z6;P29288
		E9PU07
		P61459
		D4ACM8;G3V954;Q08464
		Q6P762
		F1LMI3
		P0DP29;P0DP30;P0DP31
		O35370
		G3V7W1
		M0R8G6
		A0A0G2K5X3
		G3V7K2;O70535
		D3ZTX0
3 4	10	O54861
		Q8CIZ5
		D3ZIT9
		Q5I0M3
		A0A0G2JZS9
		P01836
		D3ZSY7
		Q10473
		P30120
		P27605
3 5	6	A0A0G2JW41
		Q00657
		A0A0G2K7Y9
		P00731
		M0RAM5;P04041
		A0A0G2JVV1;Q0H8B9
3 6	24	A0A1W2Q642;D3ZGM7
		Q68FS4
		Q63691
		P04903;Q4FZZ3
		Q6PEC1
		Q6AXM6
		M0R8A3
		G3V7N8;P97840;Q6P7Q6
		P07340
		Q4AEF8
		P45479
		P80067
		F1LWD0
		G3V6K6
		A0A0G2JZZ0
		M0R6K0;P15800
		D3ZTV3
		F1LQ10;Q5FVR3
		Q8R2H2
		A0A0G2QC46;F1M7B9;Q80W87
		D4ACX8
		P70490
		A0A0G2JSV5;P46953
		O88767
4 5	12	F1M091
		F7FMS0
		A0A0G2JSS8;Q9R063
		P16573;Q9JHL6;Q9JHL7
		F1M786;Q5GRG2
		Q9JIK1
		Q62662
		Q587K3
		B2GV72
		P02696
		G3V9M0
		P54313
4 6	55	Q9EQV6
		P08010
		D3ZD19
		Q6AXR3
		P13852
		D3ZBQ5
		M0RBU0
		Q5M872
		A0A0G2K0Q7;D3ZFU9
		M0RBH9
		Q5PPH0
		A0A096MIX6
		A0A0G2KAJ7
		F1LQ83
		P07154
		D3ZVK5
		A0A0G2JUB0;Q810F4
		B0BNH1
		Q497B0
		Q63530
		P97546
		A0A0G2K7Y0;Q63135
		F1MA37;Q9ES87
		F1M9B2
		G3V7C6
		A0A0G2K9B1;A0A0G2KB85;A0A0H2UHI5;P09006
		G3V833
		D3ZTM7
		G3V9M6
		D4A9Z8
		F1LM54
		A0A0G2JTX6;D3ZPN6
		A0A0H2UHD6;A0A0H2UI32;Q9ET32
		O35142
		G3V6P2;Q01205
		D4AAE2
		G3V6A0
		P08592;Q6P6Q5
		A0A0G2K9D7
		F1MA24;P38444
		M0R7I5
		P22734
		P97603
		Q9JHY1
		P16296
		A0A0G2K6T9
		D4A7L8
		Q63772
		G3V6K1
		G3V8X9
		A0A0G2JZ40;D4ABJ4
		M0RA79
		D3ZF96
		F1LVL2
		D3ZJA4
5 6	18	F1LUV9
		J3QTE2;Q80YN4
		A0A0G2K2W0;D3ZTG5
		Q63257
		P55280
		Q9QZK8
		Q5FVR0
		P10715
		D3ZYI0
		A0A0G2K135;Q9WUW3
		Q63434
		D3ZVB7
		P16617
		D4ABY7
		Q925Q4
		Q5XI32
		D3ZGF1;F1LSA1;P26051
		F1MAN8
1	60	A0A088DKH8;Q62893
		A0A0G2K595;Q9WTW7
		B2RYM1
		A0A0G2JY31;A0A0G2JZ73;P17475
		D3ZQR5
		A0A0H2UHR7;D3ZHA0
		A0A0G2K4M6;P62738;P63269
		P07314
		O55158
		B1WBN7
		D3ZUD8
		B2RZ72
		Q9Z2L0
		P14046
		P62804
		A0A0G2K0T2;P28648
		P41740
		A0A0G2K5P7;Q64611
		P50430
		G3V7I9;P23377
		P30904
		P68511
		Q9JJ40
		G3V7A5
		F1LP42
		P21588;Q66HL0
		A0A0G2K872;Q1WIM3
		Q5M876
		D3ZMS7
		A0A0G2K5X1;Q05820
		Q9QYU4
		P40241
		D3Z841
		D4A8Z3
		A0A0G2JXF0
		Q08834
		M0RDF2;P01805
		O35509
		P48500
		F1LW26
		F1M983;G3V9R2
		D3ZJB2
		G3V6R5
		P84039
		Q99N82
		A0A0G2K6T1;G3V844
		P07632
		Q09326
		G3V8K5;Q9Z0J6
		G3V722
		Q8R490
		P02781
		Q01177
		Q3KRC4
		P14562
		M0R4Z4
		Q9WTZ3
		P15684
		Q642B0
		P20059
2	39	Q64057
		D3ZPV8
		A2IBE2
		A0A0G2JXB1;A0A0G2JXN6;P08699
		B1H232
		P35053;Q6P7Q2
		G3V8Z5
		A0A0G2K8I5;D3ZG18
		P62260
		Q4KLL7
		G3V8V1
		D3ZZR3
		A0A0G2K8S9;Q6AYJ9
		A0A0G2JVB2;D4AC02
		F1LMA7;Q4TU93
		Q9Z2Y9
		O35567
		P48199
		A0A0G2K3Z9;Q63716
		Q10758
		A0A0G2K5U5;A0A0G2K639;F1M7H2;P15083
		E9PTY1
		O35077
		D3ZQ25
		F1LSX3;Q63072
		Q6P503
		A0A0G2K980;M0RBD5
		D4A3W2
		D4ABU7
		O35760
		Q63355
		P00762
		B0BMW0;P61107
		A0A0H2UHL7;P43303
		Q499T5
		A0A0G2JZN1
		P01048
		P97675
		P13265
3	28	A0A0G2K392;A2VCV7;Q9JJS8
		P19939
		P01039
		P70549
		A0A096P6L8
		A0A0G2K6S0
		F1LM16;P20961
		Q5I0E1
		G3V7Q7
		P35859
		Q5RJR2
		P34058
		G3V637;Q62753
		P23606
		Q99M75
		P50115
		Q5M890
		Q5XIE8
		F1M4Q3
		G3V7I0;Q9Z0V6
		D3ZET1
		P48508
		Q80WD0
		G3V6D3;P10719
		A0A0G2K210;F1LSN4
		A0A140TAI2;Q5FVF9
		F1LQI1
		D3ZPY8
4	59	G3V928
		Q499Q4
		Q66HG4
		E9PT65
		Q6P6T3
		P25113
		A0A0G2JWX4;Q6IG02
		F7F3I7
		A0A0G2JTC1;D4A6Y0
		Q6MG90
		F1MAD3
		B2RYM3
		A0A0G2K1P2;Q5RJL6
		D4A8X4
		P11762
		D3ZUR5
		A0A0G2K931;E9PSV5
		B0BMY7
		A0A0G2JSK5
		A0A0G2K7S9
		F1M7U7;P55146
		P38438
		Q641Z7
		A0A0G2KB26;Q5XI43
		O70377
		F1LYX9
		A0A0G2K1G5;A0A0G2KAU7;F1M7L7;O35806
		Q64573
		P20611;Q642D2
		Q9ES53
		Q8VD89
		P29534
		G3V7L3
		P70712
		Q6P7S1
		P10824
		M0R9L2
		A0A0G2JU71;F1LRE1
		A0A0G2K8H6;P00786
		F1M698
		M0R7P3
		Q569D2
		P15473
		P01681
		G3V6D9
		F7EKI5
		A0A0G2JWD5;Q6AY40
		P08753
		A0A0G2QC16;A0A1B0GWM7;Q5QE79
		Q8R3Z7
		M0R936
		Q99376
		Q99J86
		P02651
		Q6AYT0
		P29598;Q3KR76
		D3ZQ32
		Q8CG45
		Q642B4
5	32	Q66H69
		D4A4R7
		A0A0A0MXX5;D4A1J4
		Q9WUF4
		F1LR02
		F1M978;P97697
		Q920P6
		A0A0G2JTH4;P97829
		P08644
		P04905
		Q91XN4
		A0A0G2JY48;F1MAJ0
		A0A096MK30;A0A1W2Q6E9
		Q5XFX0
		P18422
		D3ZJF8
		F1LML2;P0CG51;P62982;P62986;Q63429
		Q63942
		P26342
		P10959
		F1M790
		D3ZXT7
		A0A0G2JWE1;A0A0G2K6J5;B2GV99;Q64119
		B2RYC9
		A0A0G2JTU6;A0A0G2K176;P08723
		Q5FWU4;Q8N7M5
		D3ZP44
		D4A8N7
		B1WC26
		D3ZD84;M0RB60
		G3V989;P97605
		Q62718
6	103	E9PSP1
		G3V8G9;Q9QW30
		P57097
		M0R5J4;P04764
		Q68FU6
		Q6AYT8
		Q9R066
		P62332
		Q63259
		D4A281
		M0R7T1
		Q4KLZ0
		Q6P734
		D3ZTX4
		D4A9T2
		A0A0G2JY76;F1LP92;Q65Z14
		Q3B8R6;Q63678
		A0A0G2K2H0;E9PSX9;E9PSY0
		Q920A6
		P17046
		Q6ZYN8
		A0A0G2JSJ2;Q4KM73
		Q62946
		A0A0G2K676;F1LPK5;Q6RY07
		P07335
		Q99MA2
		A0A140TAF0
		F1M7B3
		Q9ES58
		P01830
		M0R7K9
		Q9JJ19
		Q675A5
		Q5M7T6
		G3V8S0
		A0A0H2UHH2;P23680
		A0A0G2K561;F1LP13
		F1M7X4;Q62956
		Q06000
		A0A0G2JXZ9
		D3ZPC4
		D3ZPI8
		D1M8S3;F1M9B9;Q63621
		A0A0G2JXJ3;D3ZZ49
		P20760
		A0A0G2K7L8;F1LMS5
		P04785
		D3ZFP5
		Q498S8
		F1LNP8
		Q05511
		P63029
		Q9JI04
		E9PTA4
		Q499T2
		P85834
		A0A0G2K0Q8;D3ZEV8
		A0A0G2K845;Q8K3R4
		O88204
		G3V7Q8;P08426
		Q91XT9
		A0A0G2K3I3;D3ZJR7
		G3V7H2;O35217
		Q5EGY4
		Q6AYS3
		D3ZDH4
		D3ZM39
		P02767
		Q6AYC4
		F7FAY5
		D3ZRJ6
		P11030
		P30919
		G3V812
		Q5GAM5
		Q5U355
		P05544
		Q9WUK5
		B2B9A9
		F1M4J1
		A0A0G2JYA3;D3ZNG3
		Q5FVH2
		D3ZCH9;M0R8W9
		Q68FQ2
		P12346
		Q641X3
		Q7TP52
		A0A0G2JUT1;A0A5H1ZRU4;Q6AYP5
		D3ZNY8
		A0A0G2K2B6;Q9Z0T0
		A0A0G2JST1
		M0R485
		D4A9Q5
		O70417
		A0A0G2JTG4;A0A0G2JWF2;F1M195;F1M1Q7
		Q63041
		Q64361
		M0RDA4
		Q10743
		D3ZHA1
		P0C0K7
		A0A0G2K8F6

## Sheet: 0-17
Names	total	elements
1 2 3 4 5 6	7	Q99041;Z4YP11		Protein-glutamine gamma-glutamyltransferase 4, 2.3.2.13, Dorsal prostate transglutaminase, Dorsal protein 1, DP1, Transglutaminase-4, TGase-4
		A0A0G2K9Y0;F1LPQ6		这个ID被淘汰了
		F1LQQ8;P06760		Beta-glucuronidase (EC 3.2.1.31)
		Q9JJH9		Alpha-2u globulin, Alpha-2u globulin PGCL3, RCG31930
对照组有		Q9JJI3		Alpha-2u globulin, Alpha-2u globulin PGCL3, RCG31988
		F7EL93		Immunoglobulin superfamily, DCC subclass, member 4
		Q68FP1		Gelsolin, Actin-depolymerizing factor, ADF, Brevin
		Q6MG70;Q99PW3		Exo-alpha-sialidase (EC 3.2.1.18)
1 2 3 4 5	7	A0A0G2K2V6		Keratin, type I cytoskeletal 10
		M0R9A3		PBPC1BS-like
	lipocalin	M0RDH1		Odorant-binding protein 2B (RCG35608)
		A0A0G2K230;D3ZZI6		Desmocollin 3 (Desmocollin 3 (Predicted))
		P27590		Uromodulin (Tamm-Horsfall urinary glycoprotein) (THP) [Cleaved into: Uromodulin, secreted form]
	lipocalin	B3EY84		Lipocalin 13 (Odorant-binding protein 2A) (RCG45628)
对照组也有		Q6IRS6;Q9QX79		Fetub protein (Fetuin-B)
1 2 3 4 6	10	P08290		Asialoglycoprotein receptor 2 (ASGP-R 2) (ASGPR 2) (Hepatic lectin R2/3) (HL-2) (rHL-2)
对照组有		P07897		Aggrecan core protein (Cartilage-specific proteoglycan core protein) (CSPCP)
		P10758		Lithostathine (Islet cells regeneration factor) (ICRF) (Islet of Langerhans regenerating protein) (REG) (Pancreatic stone protein) (PSP) (Pancreatic thread protein) (PTP)
		F1MA46		Protocadherin 12
		F7F5P4		Interleukin 18-binding protein
		P20761		Ig gamma-2B chain C region (Immunoglobulin heavy chain 1a)
		G3V803;Q9Z1Y3		Cadherin-2 (Neural cadherin)
		P0DMW0;P0DMW1		Heat shock 70 kDa protein 1A (Heat shock 70 kDa protein 2) (HSP70-2) (HSP70.2)
		A0A0G2K6T9		Protocadherin 1
		M0RBF1;M0RBJ7		Complement C3
1 2 3 5 6	3	A0A0G2K7W2;F1LT79;Q5XI42		Aldehyde dehydrogenase
		D3ZAN2		Cadherin-related family member 2
		D3ZUQ1		Lipase
1 2 4 5 6	10	O55004		Ribonuclease 4 (RNase 4) (EC 3.1.27.-) (RL3)
		Q07936		Annexin A2 (Annexin II) (Annexin-2) (Calpactin I heavy chain) (Calpactin-1 heavy chain) (Chromobindin-8) (Lipocortin II) (Placental anticoagulant protein IV) (PAP-IV) (Protein I) (p36)
		D3Z9U8		S100 calcium-binding protein A7-like 2 (Similar to S100 calcium-binding protein, ventral prostate (Predicted))
		A0A140TAF0		RCG62531, isoform CRA_g (Tropomyosin 3)
		F1LZJ4		Putative hydroxypyruvate isomerase (EC 5.3.1.22)
	lipocalin	P15399		Probasin (PB) (M-40)
		F7EZQ4		Fc fragment of IgG-binding protein-like 1
		P19132;Q66HI5		Ferritin heavy chain (Ferritin H subunit) (EC 1.16.3.1) [Cleaved into: Ferritin heavy chain, N-terminally processed]
		P36374		Prostatic glandular kallikrein-6 (EC 3.4.21.35) (Glandular kallikrein-8) (rGK-8) (P1 kallikrein) (Tissue kallikrein)
		G3V6G1		Immunoglobulin joining chain (Joining chain of multimeric IgA and IgM)
1 3 4 5 6	7	A0A0G2K405;P12368		cAMP-dependent protein kinase type II-alpha regulatory subunit
		P12368		cAMP-dependent protein kinase type II-alpha regulatory subunit
		P05545		Serine protease inhibitor A3K (Serpin A3K) (CPI-21) (Contrapsin-like protease inhibitor 1) (GHR-P63) (Growth hormone-regulated proteinase inhibitor) (Kallikrein-binding protein) (KBP) (SPI-2.3) (Serine protease inhibitor 2) (SPI-2) (Thyroid hormone-regulated protein)
		G3V6X0;Q99PP0		CCN family member 4 (Wisp1 protein)
		P51635		Aldo-keto reductase family 1 member A1 (EC 1.1.1.2) (EC 1.1.1.33) (EC 1.1.1.372) (EC 1.1.1.54) (3-DG-reducing enzyme) (Alcohol dehydrogenase [NADP(+)]) (Aldehyde reductase) (Glucuronate reductase) (EC 1.1.1.19) (Glucuronolactone reductase) (EC 1.1.1.20)
		P12346		Serotransferrin (Transferrin) (Beta-1 metal-binding globulin) (Liver regeneration-related protein LRRG03) (Siderophilin)
		P22006;Q6P6X2		Seminal vesicle secretory protein 2 (Seminal vesicle secretory protein II) (SVS II)
		Q00238		Intercellular adhesion molecule 1 (ICAM-1) (CD antigen CD54)
2 3 4 5 6	4	Q9WUC4		Copper transport protein ATOX1 (ATX1 homolog protein Rah1) (Metal transport protein ATX1)
		Q64724		C-CAM4 (RCG53616, isoform CRA_b)
		P14668;Q66HH8		Annexin A5 (Anchorin CII) (Annexin V) (Annexin-5) (Calphobindin I) (CPB-I) (Endonexin II) (Lipocortin V) (Placental anticoagulant protein 4) (PP4) (Placental anticoagulant protein I) (PAP-I) (Thromboplastin inhibitor) (Vascular anticoagulant-alpha) (VAC-alpha)
		Q6AXN2
1 2 3 4	7	D3ZFC6;Q5EBC0
		A0A0G2K2R5
		O08628
		D3ZJV7
		G3V9K3
		A0A0G2K872;Q1WIM3
		P55159
1 2 3 5	4	A0A0G2JUY4
		E9PTY1
		F1M9X2;P19218
		P47967
1 2 3 6	3	F8WG88;Q62632
		A0A0G2K6Z6;P29288
		Q30KJ2
1 2 4 5	3	P00762
		P80254
		Q5M872
1 2 4 6	7	F1M5L5
		D4A144;O88917
		P97580
		A0A0G2K9D7
		P27867
		Q62635
		Q66HT1
1 2 5 6	6	O35244
		D3ZS19
		A0A0G2K7I1
		O70417
		A0A0H2UHM3;P06866
		P46462
1 3 4 5	1	P04073
1 3 4 6	2	P06911
		A0A0G2JY31;A0A0G2JZ73;P17475
1 3 5 6	10	P07314
		B4F7A5
		A0A0G2K7Y9
		Q6AYS7
		P06685
		A0A0G2JYF9
		A0A0G2K9I6;G3V7K3
		P01946
		A0A0G2KA71;Q5FVC5
		P80020
1 4 5 6	9	Q9EQX9
		P04218
		G3V7P2
		G3V8D5;P85971
		P08721
		Q68FY4
		P16296
		Q3KRC4
		F1LQW5
2 3 4 5	6	A0A0G2JSJ5;Q0PMD2
		A0A0G2JST3
		D4AC39
		Q32KJ6
		A0A0G2K6T1;G3V844
		Q497B0
2 3 4 6	5	P98089
		A9UMV8;D3ZVK7;D4ACV3;G3V9C0;M0RCL5;M0RDM4;P02262;P0C169;P0C170;P0CC09;Q00728;Q4FZT6;Q64598;Q6I8Q6
		D4A9V5
		Q8JZQ0
		Q9JI92
2 3 5 6	10	Q5U367
		P00714
		F7FJQ3
		P60711
		A0A0G2K896
		Q08420
		E9PU07
		Q9EPB1
		D4A4S5
		D4A5L9;P62898
2 4 5 6	13	Q80WY6
		A0A0G2K890;P31977
		P19468
		P12020
		G3V843;P18292
		P26772
		P09656
		D3Z8I7
		A0A0G2K3W2
		M0R7I5
		P01015
		D3ZHM9
		D3ZH39
3 4 5 6	3	F1LQ83
		F1M7V6;Q1WIM1
		Q9ESG3
1 2 3	3	Q4QQV8
		F1LQM1
		Q05030
1 2 4	2	Q5M8C3
		A0A0G2JXJ3;D3ZZ49
1 2 5	6	P07943
		A0A0G2K0N6
		A0A096MJ68
		M0R6K0;P15800
		Q6P9V1
		G3V6W3;O54947
1 2 6	18	A0A0G2JYB5
		A0A0G2JSK1
		D4AE68;P82471
		A0A0G2JSJ2;Q4KM73
		P07335
		D3ZBB2
		D3ZZ89
		Q63257
		Q5U2Q3
		O70513
		D4ACR1
		B2RZ27
		F1MAH6
		A5I9F0
		G3V8J3
		D4A2F6
		F1LUS1
		Q6P6S4
1 3 4	2	Q6IN37
		P70712
1 3 5	3	Q63475
		F1LS79
		P06757
1 3 6	10	G3V7N8;P97840;Q6P7Q6
		A0A0U1RRP9;Q7TP05
		P55280
		M0R8B5
		A0A096MK30;A0A1W2Q6E9
		D3ZWC1
		G3V963
		G3V8S9
		A0A0G2JSR9;Q91ZS3
		G3V8G5
1 4 5	15	Q6MG90
		Q9JJ19
		Q5I0E1
		G3V8R1;Q9JI85
		A0A0G2K9B1;A0A0G2KB85;A0A0H2UHI5;P09006
		P52759
		M0R3V4
		F1LRJ7;Q6IE51
		P31044
		B2GV72
		Q9QZK9
		B3DM90;Q8CGU6
		P07151
		P28826
		D4A400
1 4 6	13	Q5HZW5
		P41562
		P04639
		P04636
		A0A0G2K2P7;P80201
		Q5M819
		F1M8K0
		Q75NI5
		F1LLX7
		G3V7L4
		F7EKI5
		P02651
		Q64602
1 5 6	20	G3V836;P05371
		Q499Q4
		P08932
		P24268;Q6P6T6
		A0A0H2UHR7;D3ZHA0
		M0RBH9
		D3ZAJ1
		A0A0G2JVN2;G3V8G7;Q9JLS4
		D3ZAU0
		P05964
		P85834
		A0A0G2K135;Q9WUW3
		Q8VHC1
		Q63434
		P0DP29;P0DP30;P0DP31
		A0A0G2K3C5;Q9EQS4
		Q03336
		D3ZGF1;F1LSA1;P26051
		A0A0G2K8F6
		Q5XI77
2 3 4	3	P46413
		A0A0G2K8K8
		Q63279
2 3 5	7	D3ZE05
		P30152
		P0C0A9
		Q6VPP3
		Q8K4J7
		P04897
		A0A0G2JV12;F1LPD0
2 3 6	3	B2GV31
		B5DFJ0
		Q9R1E9
2 4 5	6	M0RBX7;M0RDX2;P15943
		P24090
		G3V7D0;O88766
		P16573;Q9JHL6;Q9JHL7
		G3V6D9
		Q5PPH0
2 4 6	12	A0A0G2K7S9
		D3ZJF9
		Q8CJD3
		O35142
		A0A0G2JSV2;M0R3X6;P47727
		A0A0G2JZL9;Q6AYD4
		Q6AYE5
		M0R8G6
		D3ZDK4
		P97675
		P61589
		P10252
2 5 6	18	D3ZJX0;D3ZPY4
		A0A0G2JWX9
		A0A0G2JV42
		F1LPR6
		D4A5U3
		P04904
		P62260
		D4A5C0
		G3V7Q8;P08426
		Q10758
		D3ZRJ6
		Q5U362
		Q9R0T4
		A0A0G2JUT1;A0A5H1ZRU4;Q6AYP5
		F1LRJ9;Q8VIF7
		Q63318
		P98158
		P38438
3 4 5	1	F1LZ11
3 4 6	4	D3ZN06
		A0A0G2JVT6
		Q8R5M3
		P57097
3 5 6	15	P19939
		A0A0G2JWD0;Q91XN5
		Q811X6
		Q63357
		A0A096MJ90;F1LNW6
		B0BNN4
		D3ZFP5
		A0A0G2K845;Q8K3R4
		P09606
		P10959
		G3V8M6
		A0A0G2JTU6;A0A0G2K176;P08723
		D3ZNY8
		A0A0G2KA90
		Q9EPF2
4 5 6	20	Q78P75
		P10760
		P29975
		M0RB22
		A0A0G2KAJ7
		P97546
		D3ZJ08;D3ZK97;M0RBX6;P84245;Q6LED0
		D3ZZR3
		Q63083
		Q5XIV1
		P48032;Q4V8L0
		Q6TA48
		G3V9M6
		O70534
		D4A9Z8
		F1MA24;P38444
		Q3T1K5
		Q3MIE4
		F1LVL2
		P14480
1 2	10	P02782
		P07150
		Q9Z2L0
		A0A0G2K8I5;D3ZG18
		P00774
		A0A0H2UHM7;Q6AYZ1
		F1M983;G3V9R2
		P09456
		B0BMW0;P61107
		Q64057
1 3	4	O55158
		A0A0G2K013;Q9QXQ0
		Q5RJR2
		Q66HG4
1 4	7	D3ZQR5
		Q03626
		D3ZIF6
		D3ZZK3
		G3V8X9
		D4A0W2
		P18427
1 5	16	D3ZBS2;Q63416
		Q66H69
		Q6P734
		A0A0G2K8K3;Q64268
		P04906
		B2RYM3
		A0A0G2K0Q7;D3ZFU9
		M0R7K9
		P14046
		F7FHF3
		Q5M876
		Q99M75
		D3ZJB2
		F1LY81
		P11980
		F1LP05;P15999
1 6	19	P62332
		A0A0G2JVW1;P24594
		Q5I0M1
		J3QTE2;Q80YN4
		Q63530
		P20760
		A0A0G2JVG3
		A0A0G2JZS9
		B1H219
		P30904
		Q6IUU3
		B2RZB5
		G3V6K6
		P08934
		P07171
		D3ZCH9;M0R8W9
		D4A9Q5
		Q64240
		Q8K4Y7
2 3	4	F1LM16;P20961
		F1M698
		Q6P7A9
		D3ZQH3
2 4	11	A0A0G2JSS8;Q9R063
		D4A183
		Q5VLR5
		D3ZUM4
		A0A0G2K664;B1WC57
		Q6AXS4
		D3ZQN7
		Q8K1G0
		Q6IRK9
		Q6GMN2
		Q642B4
2 5	19	D4A5P8
		A0A0G2JWX4;Q6IG02
		P17046
		E9PSQ1
		P62959
		G3V8K8
		P02625
		O89117
		Q91XN4
		A0A0G2JY48;F1MAJ0
		Q5XIA6
		P50115
		Q63467
		P21704
		A0A0H2UHJ1;P50116
		G3V6E7;P50609
		Q68FP3
		F1M6Q3
		G3V6Q6
2 6	28	B5DFA0
		A0A0G2K531;P23764
		F1LXY6
		Q675A5
		A0A0G2K561;F1LP13
		Q3ZAU4
		O70377
		Q6MG57
		G3V647;O35331
		P28494
		D3ZJF8
		P26342
		A0A0H2UHB3;P48284
		B4F795
		A0A0G2JV37
		F1LMI3
		F1LRH4
		F7F389;Q62930
		Q6IE55
		P08650
		A0A0G2JXI1
		O35370
		A0A0G2K980;M0RBD5
		A0A0G2KBC4;D4ACA7
		A0A0G2K9X1;Q62740
		Q5XI32
		Q07523
		A0A0G2K722
3 4	4	E9PT83
		A0A0G2JX36
		P30120
		A0A0H2UHM5;P11598
3 5	12	M0R8A3
		A0A0G2K423
		P51647
		Q8VD89
		O35509
		Q587K3
		M0R7P3
		Q5M7T5
		F1LM84
		A0A0G2K210;F1LSN4
		P14562
		P13265
3 6	15	Q4KLZ0
		Q63691
		F1M7B3
		P07340
		Q4AEF8
		A0A0G2K828
		Q9R1T3
		P63029
		P40241
		O08557
		Q3B7D6
		M0RAM5;P04041
		P31211
		M0RA79
		Q32KK2
4 5	18	G3V928
		P08010
		D3ZZT9
		D4A4R7
		Q64319
		Q6P6T3
		B0BMY7
		Q7TQ94
		Q5I0M3
		F1M3Y4
		F1LML2;P0CG51;P62982;P62986;Q63429
		Q8CHN3
		P05065
		P08753
		Q09326
		G3V7W1
		D3ZEP5
		Q6AXR3
4 6	31	D3ZJA4
		P84076;Q5PQN0
		D3ZBQ5
		P17559
		A0A0G2K676;F1LPK5;Q6RY07
		D4A934
		A0A0G2K7C3;D3ZEN1
		G3V8Y1
		Q6AYQ9
		A0A0G2K085;D3Z895
		O70244
		P07647
		F1LYX9
		G3V903
		G3V833
		Q5EGY4
		F1M7I8
		F1LM54
		F1LWD0
		D3ZLA3
		G3V6P2;Q01205
		D4AAE2
		P02631
		P08592;Q6P6Q5
		P10960
		F1LTJ5
		O35112
		Q5I0D5
		Q6IN22
		Q642B0
		E9PSP1
5 6	92	P54313
		G3V6S2
		Q6AXR4
		Q68FU6
		Q9R066
		A0A1W2Q642;D3ZGM7
		A0A0H2UHF8;P02764
		D4A281
		M0R9M6;P80204;Q5M9H3
		D3ZD19
		P01039
		D3ZTX4
		Q6PEC1
		D4A9T2
		A0A0G2JSJ8;P17164
		A0A0G2K4M6;P62738;P63269
		Q6ZYN8
		F1MAD3
		A0A0G2JYC4
		B0BN46
		Q6DGG1
		A0A0G2JUB0;Q810F4
		F1LUV9
		F1LSV0
		D3ZPC4
		P62804
		D1M8S3;F1M9B9;Q63621
		P14841
		P42123
		Q9QYU9
		G3V8V1
		A0A0G2JU92;A0A0G2JWP4;O88775
		F1MA37;Q9ES87
		Q5FVR0
		Q498S8
		F1LNP8
		A0A0G2K1L0
		G3V6H1
		F1M9B2
		Q6AYS0
		A0A0G2K0Q8;D3ZEV8
		P80202
		O88204
		M0R9U2
		G3V7H2;O35217
		P61459
		D3ZTM7
		A0A0G2JTX6;D3ZPN6
		F1LRT1;P19112
		D3ZQ25
		Q02974
		D3ZVB7
		P30919
		G3V812
		Q4V885
		Q5U355
		D4A6K7
		G3V6A0
		Q9WUK5
		F1LVR0
		A0A0G2JZZ0
		F1LNW0;F1LSG7
		M0RAZ1
		B2B9A9
		D3ZTV3
		F1M4J1
		A0A0G2JYA3;D3ZNG3
		D4A3L3
		P97553
		D4ABY7
		Q5FVH2
		Q68FQ2
		P50398
		P14740
		A0A0G2JVE6
		P02770
		A0A0G2JST1
		M0R485
		D4A7L8
		G3V827;Q08415
		P97710;Q499T3
		G3V6K1
		D3ZK14
		Q99068
		G3V722
		Q5Y4N8
		G3V7K2;O70535
		D3ZF96
		P15684
		D3ZAN3
		A0A0G2JXE0;A0A0G2JXI9;D3ZLY9;D3ZNH4;D3ZNZ9;D3ZWM5;D4A817;G3V8B3;G3V9C7;M0R4L7;M0RBQ5;Q00715
		Q9WVJ6
1	22	D3ZPY8
		O88767
		M0R7L1
		A0A0G2K1P2;Q5RJL6
		A0A0G2K6S0
		D4A263
		M0RAV0
		F8WGA2;Q9JHB9
		P01836
		B5DEI2
		G3V7A5
		D3ZM39
		P06399;Q7TQ70
		A0A0G2K8H6;P00786
		D3ZXT7
		Q9EQV9
		Q80WD0
		A0A0G2K8R6;E9PTZ7;E9PTZ9
		A0A0G2K737;Q920J4
		G3V8T4;Q9ESW0
		P25093
		M0R7T1
2	28	E9PT65
		Q3B8R6;Q63678
		M0RBK4
		P50123
		A0A096MIX6
		P08644
		P04905
		Q4KLL7
		G3V6T7;P38659
		D4A3L8
		B2GUX7
		A0A0G2K4B4;P20646
		A0A0G2K499;F1M792
		P18422
		P48199
		Q6P762
		G3V7Y3;P35434
		Q62662
		F1LSX3;Q63072
		P48500
		A0A0G2K2W1
		P01041
		A0A0G2K946
		Q6TMA8
		A0A0G2JVT5;A0A0G2K7S7;Q6MG19
		Q499T5
		M0R4Z4
		Q6IE12
3	20	P63095;Q63803
		G3V837;Q63493
		Q5M8C6
		G3V7I9;P23377
		P22283
		P34058
		P24368
		Q4KLZ6
		A0A0G2K151;P02650
		P10824
		M0R5R0;P53813
		A0A0G2JU25;D3ZFD2
		G3V7I0;Q9Z0V6
		D3ZVQ0
		Q99MF4
		Q8R3Z7
		F1MAE5
		G3V9M0
		A0A0G2K9E0;E2RUH2;P29315
		A0A0G2K595;Q9WTW7
4	40	Q9WUF4
		Q80YV8
		A0A0G2K022;I6L9G5
		F1LVQ8
		F7F3I7
		Q80WD1
		D4A8X4
		O54861
		D3ZVK5
		P11762
		A0A0G2K931;E9PSV5
		P0DSP1
		Q8CIZ5
		D3ZIT9
		P63018
		G3V826;P50137
		B0BNL6
		P22282
		A0A0G2K1G5;A0A0G2KAU7;F1M7L7;O35806
		F1M786;Q5GRG2
		F1M861
		P54311
		Q6AYR8
		Q6P7S1
		A0A096MJP5
		D4A4L6;M0R692
		A0A0G2JXF0
		P15473
		P01681
		Q642G2
		A0A0G2JWE1;A0A0G2K6J5;B2GV99;Q64119
		P48508
		Q5EBA7
		A0A0G2QC16;A0A1B0GWM7;Q5QE79
		M0R936
		A0A0G2JV24;M0R979
		P20767
		Q63772
		D3ZQ32
		Q62718
5	104	O70489
		P20059
		Q6AYT8
		D3ZQP6
		A0A0A0MXX5;D4A1J4
		F1M091
		A0A0G2JSW0;P18666
		D3ZTX0
		Q68FS4
		Q6RUV5
		F7FMS0
		Q6AXM6
		F1LR02
		F1M978;P97697
		P48037;Q6IMZ3
		P01830
		P16391
		A0A096MJ41
		F1M9Z5
		Q64230
		P42854
		Q64605
		D3ZUD8
		P22057
		F1LMW3
		P27274
		P61972
		P53369
		P38918
		G3V7Q7
		P50399
		D3ZUR5
		Q8K4G9
		D3ZQ74;Q63321
		P47853
		A0A0G2K0T2;P28648
		D3ZSU7
		Q562C9
		P34900;Q6IRK3
		F1M7U7;P55146
		A0A0G2K7L8;F1LMS5
		Q498R7
		Q00657
		P26453
		P10715
		A0A0G2JVB2;D4AC02
		Q6P767
		A0A0G2K4M4;A0A0G2K7A3;A0A0G2KAF5
		A0A0G2K930;P09527
		G3V9L4
		P45479
		Q64573
		P18418
		Q9JJ40
		Q5XIL0
		A0A0G2K3Z9;Q63716
		Q4FZV0
		F1M9V7
		P07861
		Q62867
		Q9JIK1
		D3ZMS7
		P00731
		M0R9L2
		Q9QYU4
		D3Z841
		D4A8Z3
		A0A0G2K1E1;E9PSS8;Q6MGB9
		B0K010
		O55006
		A0A0G2K8G8
		F1M790
		O88989
		D4ABU7
		P97584
		O35760
		P19814
		G3V6R5
		P32736
		P04797
		P84039
		Q4KMA8;Q9JJ22
		Q9JHY1
		Q9ESS6
		G3V8H1
		D3ZCH6
		D3ZP44
		A0A0G2JSZ5;Q63081
		P07632
		Q6P7B6
		Q63355
		Q10473
		Q99J86
		A0A0G2K4K4;G3V6U1;P55016;Q5PQV1
		A0A140TAI2;Q5FVF9
		A0A0H2UHL7;P43303
		P29598;Q3KR76
		P01048
		F7DLY1
		Q8R490
		D3ZD84;M0RB60
		A0A0G2JZ40;D4ABJ4
		Q32KJ5
		A0A0G2JVV1;Q0H8B9
6	91	G3V8G9;Q9QW30
		M0R5J4;P04764
		F1LTY5
		Q9EQV6
		A0A1B0GWN8;Q812E9
		A0A0G2JSP1
		Q63259
		P14408
		F1LQC5
		A0A0G2K588;D4A917
		P04903;Q4FZZ3
		P70549
		A0A0G2JXB1;A0A0G2JXN6;P08699
		A0A0G2JY76;F1LP92;Q65Z14
		A0A0G2K2H0;E9PSX9;E9PSY0
		P13852
		P32755
		P62963
		Q9ES58
		P09034
		Q5M7T9
		A0A0G2JTX5;A0A0G2K238;F1M7X5
		A0A0G2JSZ3;Q06880
		Q5M7T6
		P32038
		G3V8S0
		A0A0H2UHH2;P23680
		P07154
		Q63797;Q6P9V7
		A0A0G2JXZ9
		D3ZXY4
		P08649
		P19804
		A0A0G2K2W0;D3ZTG5
		A0A0G2K7Y0;Q63135
		Q9QZK8
		P04785
		D3ZYI0
		Q9QX71
		Q9JI04
		P20762
		Q499T2
		D3ZCG9;D3ZQM3
		Q641Z6
		A0A0G2K3I3;D3ZJR7
		P80067
		Q6AYS3
		D3ZDH4
		D4ACM8;G3V954;Q08464
		F1M498
		P02767
		Q6AYC4
		P46720
		F7FAY5
		P11030
		Q5GAM5
		P05544
		Q08834
		M0RDF2;P01805
		D4AE27
		G3V686
		Q5M891;Q63514
		P22734
		A0A0G2K398;F8WFK6;P36970
		P97603
		A0A096MKB1
		B2RYC9
		B1PLB1;B1PLB2
		O70352;Q6IN14
		Q641X3
		Q7TP52
		B5DEZ8
		D4ACX8
		P70490
		Q925Q4
		P04642
		P02696
		Q5I0D7
		D3ZGB8
		Q63041
		P47820
		Q64361
		A0A0G2JSV5;P46953
		M0RDA4
		Q8CG45
		P85973
		F1LQI1
		Q10743
		D3ZHA1
		P0C0K7
