# Supplementary material for: Urine proteomic analysis of the rat e-cigarette model
Source: PeerJ. 2023 Sep 22;11:e16041. doi: 10.7717/peerj.16041 (PMC10519197; doi:10.7717/peerj.16041)
Supplement: Supplemental Information 7 [file peerj-11-16041-s007.xlsx]

## Sheet: Sheet1
		D0	D5	D10	D15
control	1	181	243	260	309
	2	181	242	260	304
	3	187	238	256	307
	4	189	251	261	307
	11	179	253	266	310
treated	5	191	248	275	316
	6	180	234	242	273
	7	192	240	257	293
	8	179	244	257	294
	9	182	249	271	324
	10	176	244	263	321
