# Supplementary material for: Urine proteomic analysis of the rat e-cigarette model
Source: PeerJ journal article supplement (doi:10.7717/peerj.16041), 2023-09-22
Supplement: Table_S1.pdf [file Table_S1.pdf]

**Table S1. Differential proteins identified in the D3 test group before and after self-control in 6 rats**

| UniProt accession | Human ortholog | Protein name                                          | Fold change(vs D0) |       |       |       |       |       |
|-------------------|----------------|-------------------------------------------------------|--------------------|-------|-------|-------|-------|-------|
|                   |                |                                                       | Rat 1              | Rat 2 | Rat 3 | Rat 4 | Rat 5 | Rat 6 |
| P08721            | P10451         | Osteopontin                                           | 3.29               | 3.60  | 2.93  | 0.65  | 2.07  | 0.55  |
| A0A0G2JYF9        | O15232         | Matrilin 3                                            | 4.00               | 2.11  | 2.24  | 2.93  | 2.51  | 0.44  |
| P07151            | P61769         | Beta-2-microglobulin                                  | 1.91               | 1.73  | 2.23  | 0.62  | 2.35  | -     |
| Q6IRS6            | Q9UGM5         | Fetuin-B                                              | 0.47               | 0.40  | 0.47  | 0.32  | 0.31  | -     |
| Q9QYU9            | -              | Odorant-binding protein 1F                            | 0.53               | 0.46  | 0.41  | 0.65  | -     | 0.26  |
| Q64724            | -              | C-CAM4                                                | 0.59               | 0.67  | 0.53  | 0.40  | -     | 0.22  |
| B3EY84            | Q9NY56         | Lipocalin 13, odorant-binding protein 2A              | 0.59               | 0.59  | 0.39  | 0.63  | -     | 0.22  |
| P22006            | -              | Seminal vesicle secretory protein 2                   | 0.37               | 3.97  | 9.74  | 0.12  | -     | 0.09  |
| F1LP05            | -              | ATP synthase subunit alpha                            | 0.38               | 0.45  | 0.31  | -     | 2.56  | 5.19  |
| Q07936            | P07355         | Annexin A2                                            | 0.60               | 4.19  | -     | 1.59  | 1.82  | 2.39  |
| P05545            | -              | Serine protease inhibitor A3K                         | 0.62               | 0.60  | -     | 0.64  | 0.56  | 0.46  |
| D4AE68            | -              | Guanine nucleotide-binding protein G(q) subunit alpha | -                  | 0.57  | 0.28  | 2.32  | 2.84  | 4.03  |
| G3V803            | P19022         | Cadherin-2, Neural cadherin                           | -                  | 0.65  | 0.56  | 0.59  | 0.57  | 0.32  |
| P46413            | P48637         | Glutathione synthetase                                | -                  | 0.42  | 0.50  | 0.42  | 0.52  | 0.45  |
| Q5I0D7            | P12955         | Xaa-Pro dipeptidase                                   | -                  | 0.39  | 0.59  | 0.44  | 0.65  | 0.45  |
