# Supplementary material for: Urine proteomic analysis of the rat e-cigarette model
Source: PeerJ journal article supplement (doi:10.7717/peerj.16041), 2023-09-22
Supplement: Table_S2.pdf [file Table_S2.pdf]

Table S2. Differential proteins identified in the D12 test group before and after self-control in 6 rats

| UniProt accession | Human ortholog | Protein name                                          | Fold change(vs D0) |       |       |       |       |       |
|-------------------|----------------|-------------------------------------------------------|--------------------|-------|-------|-------|-------|-------|
|                   |                |                                                       | Rat 1              | Rat 2 | Rat 3 | Rat 4 | Rat 5 | Rat 6 |
| D4AE68            | -              | Guanine nucleotide-binding protein G(q) subunit alpha | 2.89               | 1.80  | 0.50  | 3.07  | 1.57  | 4.83  |
| Q6IRS6            | Q9UGM5         | Fetuin-B                                              | 0.42               | 0.57  | 0.62  | 0.53  | 0.53  | 0.33  |
| M0RDH1            | -              | Odorant-binding protein 2B                            | 2.49               | 2.20  | 2.14  | 2.90  | 2.17  | 0.46  |
| G3V803            | P19022         | Cadherin-2, Neural cadherin                           | 0.47               | 0.54  | 0.42  | 0.57  | 0.58  | 0.22  |
| D4A9V5            | -              | Lysyl oxidase homolog                                 | 0.54               | 0.40  | 0.67  | 0.47  | 0.41  | 0.20  |
| P07151            | P61769         | Beta-2-microglobulin                                  | 2.75               | 2.07  | 2.84  | 0.57  | 2.08  | 2.19  |
| A0A0G2K230        | Q14574         | Desmocollin 3                                         | 1.96               | 2.73  | 4.04  | 2.41  | 3.02  | -     |
| P51635            | P14550         | Aldo-keto reductase family 1 member A1                | 2.29               | 1.62  | 1.96  | 2.87  | 3.40  | -     |
| P14668            | P08758         | Annexin A5                                            | 1.56               | 1.84  | 2.92  | 2.96  | 5.95  | -     |
| G3V8V1            | -              | Granulin, isoform CRA_c                               | 0.54               | 0.58  | 0.52  | -     | 0.22  | 0.32  |
| A0A0G2K6Z6        | -              | Tartrate-resistant acid phosphatase type 5            | 0.38               | 0.39  | 0.49  | -     | 0.29  | 0.27  |
| P20761            | -              | Ig gamma-2B chain C region                            | 0.33               | 1.79  | 1.78  | -     | 1.69  | 2.55  |
| Q68FP1            | P06396         | Gelsolin                                              | 2.20               | 1.82  | 2.10  | -     | 2.51  | 2.38  |
| F1LPR6            | -              | Immunoglobulin heavy constant epsilon                 | 2.67               | 2.85  | -     | 2.02  | 2.94  | 3.33  |
| F1M5L5            | -              | Ig-like domain-containing protein                     | 3.89               | 1.75  | -     | 2.78  | 1.97  | 0.53  |
| P12020            | P54107         | Cysteine-rich secretory protein 1                     | 2.38               | 2.41  | -     | 0.13  | 4.77  | 4.95  |
| F1M8K0            | -              | Dystroglycan 1                                        | 0.50               | 0.47  | -     | 0.23  | 0.62  | 0.47  |
| Q6VPP3            | -              | Chloride channel accessory 4                          | 0.62               | 0.30  | -     | 0.39  | 1.61  | 0.65  |
| G3V8T4            | -              | DNA damage-binding protein 1                          | 2.51               | 1.69  | -     | 4.95  | 1.99  | 2.72  |
| Q99041            | P49221         | Protein-glutamine gamma-glutamyltransferase 4         | -                  | 0.05  | 0.04  | 0.06  | 0.24  | 16.03 |
| P0DMW0            | P0DMV8         | Heat shock 70 kDa protein 1A                          | -                  | 2.75  | 2.41  | 0.33  | 5.65  | 3.30  |
