# Supplementary material for: Urine proteomic analysis of the rat e-cigarette model
Source: PeerJ journal article supplement (doi:10.7717/peerj.16041), 2023-09-22
Supplement: Table_S3.pdf [file Table_S3.pdf]

Table S3. Differential proteins identified in the D15 test group before and after self-control in 6 rats

| UniProt accession | Human ortholog | Protein name                                                 | Fold change(vs D0) |      |       |       |      |       |
|-------------------|----------------|--------------------------------------------------------------|--------------------|------|-------|-------|------|-------|
|                   |                |                                                              | Rat1               | Rat2 | Rat3  | Rat4  | Rat5 | Rat6  |
| Q6IRS6            | Q9UGM5         | Fetuin-B                                                     | 0.65               | 0.45 | 0.43  | 0.42  | 0.39 | 0.32  |
| B3EY84            | Q9NY56         | Lipocalin 13, odorant-binding protein 2A                     | 1.88               | 2.94 | 1.77  | 1.68  | 2.53 | 0.61  |
| D3ZS19            | -              | Alpha-2-macroglobulin-like 1                                 | 0.63               | 0.57 | 0.60  | 1.69  | 2.03 | 4.55  |
| P10960            | P07602         | Prosaposin                                                   | 2.35               | 1.93 | 1.77  | 0.58  | 0.63 | 0.27  |
| Q9JJI3            | -              | Alpha-2u globulin                                            | 10.57              | 1.68 | 11.56 | 2.54  | 4.85 | 20.87 |
| P07151            | P61769         | Beta-2-microglobulin                                         | 6.87               | 2.43 | 2.81  | 1.74  | 4.07 | 2.70  |
| D3ZE05            | -              | Cartilage intermediate layer protein 2                       | 0.56               | 0.27 | 0.20  | 0.55  | 0.29 | -     |
| D4A183            | -              | Similar to Vanin-3                                           | 2.76               | 6.24 | 5.36  | 5.63  | 2.80 | -     |
| P27590            | P07911         | Uromodulin                                                   | 3.73               | 4.67 | 4.08  | 4.81  | 3.75 | -     |
| Q8K4J7            | -              | Resistin                                                     | 2.22               | 2.88 | 2.74  | 0.66  | 1.58 | -     |
| D4A133            | -              | H(+)-transporting two-sector ATPase                          | 0.51               | 0.46 | 0.57  | 2.79  | 1.56 | -     |
| P80020            | P51161         | Gastrotropin                                                 | 5.16               | 1.51 | 2.54  | 18.35 | -    | 15.76 |
| F1LZ11            | -              | Ig-like domain-containing protein                            | 0.55               | 2.32 | 4.12  | 2.63  | -    | 3.97  |
| A0A0G2JWD0        | -              | Prominin 1                                                   | 0.24               | 0.57 | 0.65  | 1.78  | -    | 2.59  |
| A0A0G2K2R5        | -              | EGF-containing fibulin extracellular matrix protein 2        | 0.42               | 0.59 | 0.42  | 0.33  | -    | 1.63  |
| F7F389            | -              | Complement component C9                                      | 1.59               | 2.28 | 1.51  | 2.29  | -    | 2.31  |
| P14668            | P08758         | Annexin A5                                                   | 1.58               | 2.07 | 2.80  | 1.88  | -    | 4.62  |
| F1M9X2            | -              | Pancreatic secretory granule membrane major glycoprotein GP2 | 1.50               | 3.22 | 3.04  | 0.53  | -    | 0.45  |
| P07171            | P05937         | Calbindin                                                    | 3.64               | 4.36 | 1.58  | 0.53  | -    | 0.43  |
| P46413            | P48637         | Glutathione synthetase                                       | 0.39               | 0.52 | 0.39  | 0.51  | -    | 0.48  |
| P42854            | Q6UW15         | Regenerating islet-derived protein 3-gamma                   | 3.39               | 4.12 | 2.87  | 1.68  | -    | 0.32  |
| Q99041            | P49221         | Protein-glutamine gamma-glutamyltransferase 4                | 0.20               | 0.07 | 2.33  | -     | 7.78 | 6.79  |
| P55159            | P27169         | Serum paraoxonase/arylesterase 1                             | 0.44               | 0.57 | 0.53  | -     | 0.39 | 1.52  |
| Q8R5M3            | Q8TF66         | Leucine-rich repeat-containing protein 15                    | 0.38               | 0.32 | 0.45  | -     | 0.66 | 3.21  |
| F1LQQ8            | -              | Beta-glucuronidase                                           | 11.84              | 1.57 | 7.06  | -     | 5.79 | 5.25  |
| A0A0G2K896        | -              | Similar to RIKEN cDNA 1300017J02                             | 0.55               | 0.57 | -     | 1.58  | 1.86 | 10.58 |
| M0R3V4            | -              | Myeloid-derived growth factor                                | 3.83               | 2.86 | -     | 2.94  | 3.30 | 2.28  |
| B2RZ27            | Q9H299         | SH3 domain-binding glutamic acid-rich-like protein 3         | 0.63               | 0.51 | -     | 0.57  | 0.47 | 0.45  |
| A0A0G2JSV2        | -              | Carbonyl reductase                                           | 0.47               | 1.62 | -     | 6.72  | 4.47 | 2.96  |
| D4A9V5            | -              | Lysyl oxidase homolog                                        | 0.53               | 0.51 | -     | 0.25  | 0.48 | 0.14  |
| F1M6Q3            | -              | Collagen type IV alpha 2 chain                               | 0.44               | 0.51 | -     | 0.35  | 0.52 | 2.30  |

|        |        |                                        |      |      |       |      |      |       |
|--------|--------|----------------------------------------|------|------|-------|------|------|-------|
| F7F5P4 | -      | Interleukin 18-binding protein         | 0.53 | -    | 0.47  | 0.34 | 0.53 | 0.23  |
| G3V803 | P19022 | Cadherin-2, Neural cadherin            | 0.54 | -    | 0.50  | 0.45 | 0.51 | 0.27  |
| Q9JJH9 | -      | Alpha-2u globulin                      | 9.11 | -    | 13.25 | 1.59 | 4.04 | 20.32 |
| D4A144 | -      | Adhesion G protein-coupled receptor L1 | -    | 0.57 | 0.43  | 0.34 | 0.53 | 0.34  |
| Q63083 | Q02818 | Nucleobindin-1                         | -    | 1.91 | 1.98  | 0.51 | 0.61 | 0.33  |
| P20761 | -      | Ig gamma-2B chain C region             | -    | 3.56 | 2.80  | 1.90 | 2.08 | 3.41  |
