# Supplementary material for: Urine proteomic analysis of the rat e-cigarette model
Source: PeerJ journal article supplement (doi:10.7717/peerj.16041), 2023-09-22
Supplement: Table_S4.pdf [file Table_S4.pdf]

Table S4. Differential proteins identified in the D17 test group before and after self-control in 6 rats

| UniProt accession | Human ortholog | Protein name                                                      | Fold change(vs D0) |       |      |       |       |       |
|-------------------|----------------|-------------------------------------------------------------------|--------------------|-------|------|-------|-------|-------|
|                   |                |                                                                   | Rat1               | Rat2  | Rat3 | Rat4  | Rat5  | Rat6  |
| Q99041            | P49221         | Protein-glutamine<br>gamma-glutamyltransferase 4                  | 3.27               | 0.02  | 0.65 | 0.07  | 0.15  | 2.02  |
| Q9JJH9            | -              | Alpha-2u globulin                                                 | 1.65               | 9.42  | 9.40 | 4.18  | 9.97  | 28.93 |
| Q68FP1            | P06396         | Gelsolin                                                          | 2.11               | 1.92  | 2.00 | 2.48  | 0.61  | 2.33  |
| Q6MG70            | -              | Exo-alpha-sialidase                                               | 0.63               | 0.42  | 0.46 | 0.50  | 0.40  | -     |
| M0R9A3            | -              | PBPC1BS-like                                                      | 0.34               | 0.62  | 0.56 | 0.38  | 3.11  | -     |
| M0RDH1            | -              | Odorant-binding protein 2B                                        | 2.68               | 2.52  | 2.71 | 3.26  | 8.20  | -     |
| A0A0G2K<br>230    | Q14574         | Desmocollin 3                                                     | 2.17               | 3.12  | 4.04 | 3.27  | 8.20  | -     |
| P27590            | P07911         | Uromodulin                                                        | 4.77               | 4.02  | 2.65 | 4.66  | 13.14 | -     |
| B3EY84            | Q9NY56         | Lipocalin 13, Odorant-binding<br>protein 2A                       | 2.13               | 1.64  | 1.76 | 2.21  | 8.61  | -     |
| P08290            | P07307         | Asialoglycoprotein receptor 2                                     | 0.43               | 0.27  | 0.63 | 0.29  | -     | 0.23  |
| P10758            | -              | Lithostathine                                                     | 2.85               | 8.60  | 6.04 | 3.68  | -     | 5.29  |
| P20761            | -              | Ig gamma-2B chain C region                                        | 0.31               | 3.85  | 2.40 | 2.59  | -     | 2.95  |
| G3V803            | P19022         | Cadherin-2, Neural cadherin                                       | 0.57               | 0.39  | 0.57 | 0.43  | -     | 0.19  |
| P0DMW0            | P0DMV8         | Heat shock 70 kDa protein 1A                                      | 0.67               | 3.06  | 2.22 | 0.33  | -     | 4.77  |
| A0A0G2K<br>6T9    | -              | Protocadherin 1                                                   | 0.32               | 0.29  | 0.38 | 0.34  | -     | 0.13  |
| A0A0G2K<br>7W2    | P43353         | Aldehyde dehydrogenase                                            | 0.61               | 0.17  | 0.22 | -     | 3.24  | 0.48  |
| O55004            | P34096         | Ribonuclease 4                                                    | 0.63               | 2.22  | -    | 1.72  | 3.56  | 0.62  |
| Q07936            | P07355         | Annexin A2                                                        | 0.58               | 4.31  | -    | 0.65  | 0.15  | 5.30  |
| A0A140T<br>AF0    | -              | Tropomyosin 3                                                     | 3.53               | 15.99 | -    | 11.38 | 40.92 | 3.48  |
| P19132            | P02794         | Ferritin heavy chain                                              | 0.59               | 0.37  | -    | 0.37  | 6.60  | 3.87  |
| G3V6G1            | -              | Immunoglobulin joining chain                                      | 3.99               | -     | 2.85 | 1.66  | 17.34 | 2.55  |
| A0A0G2K<br>405    | P13861         | cAMP-dependent protein kinase<br>type II-alpha regulatory subunit | 1.98               | -     | 0.54 | 1.73  | 0.65  | 4.22  |
| P12368            | P13861         | cAMP-dependent protein kinase<br>type II-alpha regulatory subunit | 1.98               | -     | 0.54 | 1.73  | 0.65  | 4.22  |
| P05545            | -              | Serine protease inhibitor A3K                                     | 0.65               | -     | 0.53 | 0.53  | 0.58  | 0.38  |
| P51635            | P14550         | Aldo-keto reductase family 1<br>member A1                         | 2.13               | -     | 1.51 | 1.74  | 0.22  | 4.03  |
| P12346            | P02787         | Serotransferrin                                                   | 0.60               | -     | 0.66 | 0.60  | 0.11  | 4.34  |
| Q00238            | P05362         | Intercellular adhesion molecule<br>1                              | -                  | 0.65  | 0.63 | 0.58  | 2.18  | 0.42  |
| Q9WUC4            | O00244         | Copper transport protein<br>ATOX1                                 | -                  | 0.66  | 1.73 | 0.62  | 4.80  | 0.56  |

---

|        |        |            |   |      |      |      |      |      |
|--------|--------|------------|---|------|------|------|------|------|
| Q64724 | -      | C-CAM4     | - | 0.66 | 0.64 | 0.42 | 1.96 | 0.39 |
| P14668 | P08758 | Annexin A5 | - | 1.64 | 2.94 | 1.59 | 0.18 | 6.35 |

---
