# Supplementary material for: Urine proteomic analysis of the rat e-cigarette model
Source: PeerJ journal article supplement (doi:10.7717/peerj.16041), 2023-09-22
Supplement: Table_S5.pdf [file Table_S5.pdf]

Table S5. Biological processes enriched by the differential proteins identified jointly before and after comparison in five or more treated rats

| Biological process                                                                                           | P-value  |          |          |          |
|--------------------------------------------------------------------------------------------------------------|----------|----------|----------|----------|
|                                                                                                              | D3       | D12      | D15      | D17      |
| negative regulation of endopeptidase activity                                                                | 7.00E-03 | -        | -        | -        |
| negative regulation of endothelial cell proliferation                                                        | 3.10E-02 | -        | -        | -        |
| response to cadmium ion                                                                                      | 3.70E-02 | -        | 8.70E-02 | -        |
| antibacterial humoral response                                                                               | 4.80E-02 | -        | -        | 9.40E-02 |
| antimicrobial humoral immune response mediated by antimicrobial peptide                                      | 7.40E-02 | -        | -        | -        |
| protein stabilization                                                                                        | -        | 2.90E-05 | -        | 3.30E-02 |
| lysosomal transport                                                                                          | -        | 1.50E-04 | -        | 2.80E-02 |
| protein refolding                                                                                            | -        | 2.20E-04 | -        | 3.40E-02 |
| positive regulation of endoribonuclease activity                                                             | -        | 1.90E-03 | -        | 3.00E-03 |
| cellular heat acclimation                                                                                    | -        | 4.80E-03 | -        | 7.50E-03 |
| positive regulation of nucleotide-binding oligomerization domain containing 2 signaling pathway              | -        | 5.80E-03 | -        | 9.00E-03 |
| negative regulation of transcription from RNA polymerase II promoter in response to stress                   | -        | 5.80E-03 | -        | 9.00E-03 |
| positive regulation of microtubule nucleation                                                                | -        | 8.60E-03 | -        | 1.30E-02 |
| negative regulation of inclusion body assembly                                                               | -        | 9.60E-03 | -        | 1.50E-02 |
| positive regulation of tumor necrosis factor-mediated signaling pathway                                      | -        | 1.20E-02 | -        | 1.90E-02 |
| amyloid fibril formation                                                                                     | -        | 1.30E-02 | -        | -        |
| vesicle-mediated transport                                                                                   | -        | 1.40E-02 | -        | 3.20E-02 |
| negative regulation of mitochondrial outer membrane permeabilization involved in apoptotic signaling pathway | -        | 1.40E-02 | -        | 2.20E-02 |
| negative regulation of apoptotic process                                                                     | -        | 1.80E-02 | -        | -        |
| positive regulation of RNA splicing                                                                          | -        | 1.80E-02 | -        | 2.80E-02 |
| chaperone-mediated protein complex assembly                                                                  | -        | 2.00E-02 | -        | 3.10E-02 |
| negative regulation of endoplasmic reticulum stress-induced intrinsic apoptotic signaling pathway            | -        | 2.00E-02 | -        | 3.10E-02 |
| response to ethanol                                                                                          | -        | 2.00E-02 | -        | 4.60E-02 |
| regulation of mitotic spindle assembly                                                                       | -        | 2.10E-02 | -        | 3.20E-02 |
| regulation of protein ubiquitination                                                                         | -        | 2.10E-02 | -        | 3.20E-02 |
| cellular response to unfolded protein                                                                        | -        | 2.20E-02 | -        | 5.40E-04 |
| response to unfolded protein                                                                                 | -        | 3.20E-02 | -        | 1.20E-03 |
| chaperone mediated protein folding requiring cofactor                                                        | -        | 3.20E-02 | -        | 5.00E-02 |
| positive regulation of erythrocyte differentiation                                                           | -        | 3.30E-02 | -        | 5.10E-02 |
| negative regulation of extrinsic apoptotic signaling pathway in absence of ligand                            | -        | 3.50E-02 | -        | 5.40E-02 |
| mRNA catabolic process                                                                                       | -        | 3.60E-02 | -        | 5.50E-02 |
| positive regulation of T cell-mediated cytotoxicity                                                          | -        | 3.70E-02 | -        | -        |
| binding of sperm to zona pellucida                                                                           | -        | 4.60E-02 | -        | -        |

|                                                                                   |   |          |          |          |
|-----------------------------------------------------------------------------------|---|----------|----------|----------|
| ATP metabolic process                                                             | - | 4.70E-02 | -        | 7.20E-02 |
| negative regulation of protein ubiquitination                                     | - | 5.40E-02 | -        | 8.30E-02 |
| cellular response to heat                                                         | - | 5.50E-02 | -        | 8.50E-02 |
| positive regulation of interleukin-8 production                                   | - | 6.20E-02 | -        | 9.40E-02 |
| phagocytosis, engulfment                                                          | - | 6.60E-02 | -        | -        |
| positive regulation of proteasomal ubiquitin-dependent protein catabolic process  | - | 7.20E-02 | -        | -        |
| negative regulation of transforming growth factor beta receptor signaling pathway | - | 7.40E-02 | -        | -        |
| response to heat                                                                  | - | 8.30E-02 | -        | -        |
| heterophilic cell–cell adhesion via plasma membrane cell adhesion molecules       | - | -        | 2.90E-03 | 6.40E-02 |
| innate immune response                                                            | - | -        | 5.60E-03 | -        |
| complement activation, classical pathway                                          | - | -        | 6.40E-03 | -        |
| metanephric distal convoluted tubule development                                  | - | -        | 7.30E-03 | -        |
| vitamin K metabolic process                                                       | - | -        | 9.10E-03 | -        |
| micturition                                                                       | - | -        | 1.10E-02 | -        |
| defence response to gram-negative bacterium                                       | - | -        | 1.30E-02 | -        |
| glucocorticoid metabolic process                                                  | - | -        | 1.60E-02 | -        |
| neutrophil migration                                                              | - | -        | 3.10E-02 | -        |
| retina layer formation                                                            | - | -        | 4.60E-02 | -        |
| positive regulation of MAPK cascade                                               | - | -        | 5.10E-02 | -        |
| positive regulation of reactive oxygen species metabolic process                  | - | -        | 6.50E-02 | -        |
| iron ion transport                                                                | - | -        | 6.90E-02 | 5.70E-02 |
| cochlea development                                                               | - | -        | 7.20E-02 | -        |
| positive regulation of B cell activation                                          | - | -        | 8.40E-02 | -        |
| cellular response to organic substance                                            | - | -        | 8.60E-02 | -        |
| phagocytosis, recognition                                                         | - | -        | 9.10E-02 | -        |
| response to lipopolysaccharide                                                    | - | -        | 9.10E-02 | -        |
| cellular aldehyde metabolic process                                               | - | -        | -        | 4.50E-05 |
| aldehyde catabolic process                                                        | - | -        | -        | 4.50E-03 |
| lipid metabolic process                                                           | - | -        | -        | 1.90E-02 |
| homophilic cell adhesion via plasma membrane adhesion molecules                   | - | -        | -        | 2.20E-02 |
| positive regulation of NF-kappaB transcription factor activity                    | - | -        | -        | 2.40E-02 |
| response to thyroid hormone                                                       | - | -        | -        | 2.80E-02 |
| cell–cell adhesion                                                                | - | -        | -        | 3.00E-02 |
| negative regulation of cell proliferation                                         | - | -        | -        | 3.00E-02 |
| glomerular filtration                                                             | - | -        | -        | 3.10E-02 |
| leukocyte cell–cell adhesion                                                      | - | -        | -        | 4.50E-02 |
| retina homeostasis                                                                | - | -        | -        | 5.30E-02 |
| positive regulation of gene expression                                            | - | -        | -        | 6.00E-02 |
| calcium ion homeostasis                                                           | - | -        | -        | 6.70E-02 |
| response to hypoxia                                                               | - | -        | -        | 6.80E-02 |

---

|                                     |   |   |   |          |
|-------------------------------------|---|---|---|----------|
| cellular iron ion homeostasis       | - | - | - | 7.50E-02 |
| response to organic cyclic compound | - | - | - | 8.40E-02 |

---
